1 Title: Adipose tissue distribution from body MRI is associated with cross-sectional and longitudinal  
2 brain age in adults

3  
4 Authors: Dani Beck<sup>1,2,3</sup>, Ann-Marie G. de Lange<sup>1,4,5</sup>, Dag Alnæs<sup>1,6</sup>, Ivan I. Maximov<sup>1,2,7</sup>, Mads L.  
5 Pedersen<sup>1,2</sup>, Olof Dahlqvist Leinhard<sup>8,9,10</sup>, Jennifer Linge<sup>8,10</sup>, Rozalyn Simon<sup>8,9,10</sup>, Geneviève  
6 Richard<sup>1</sup>, Kristine M. Ulrichsen<sup>1,2,3</sup>, Erlend S. Dørum<sup>1,2,3</sup>, Knut K. Kolskår<sup>1,2,3</sup>, Anne-Marthe  
7 Sanders<sup>1,2,3</sup>, Adriano Winterton<sup>1</sup>, Tiril P. Gurholt<sup>1</sup>, Tobias Kaufmann<sup>1,11</sup>, Nils Eiel Steen<sup>1</sup>, Jan Egil  
8 Nordvik<sup>12</sup>, Ole A. Andreassen<sup>1,13</sup>, Lars T. Westlye<sup>1,2,13</sup>

9  
10 <sup>1</sup> NORMENT, Division of Mental Health and Addiction, Oslo University Hospital & Institute of  
11 Clinical Medicine, University of Oslo, Norway

12 <sup>2</sup> Department of Psychology, University of Oslo, Norway

13 <sup>3</sup> Sunnaas Rehabilitation Hospital HT, Nesodden, Norway

14 <sup>4</sup> LREN, Centre for Research in Neurosciences-Department of Clinical Neurosciences, CHUV and  
15 University of Lausanne, Lausanne, Switzerland

16 <sup>5</sup> Department of Psychiatry, University of Oxford, Warneford Hospital, Oxford, UK

17 <sup>6</sup> Bjørknes College, Oslo, Norway

18 <sup>7</sup> Department of Health and Functioning, Western Norway University of Applied Sciences, Bergen,  
19 Norway

20 <sup>8</sup> AMRA Medical AB, Linköping, Sweden

21 <sup>9</sup> Center for Medical Image Science and Visualization (CMIV), Linköping University, Linköping,  
22 Sweden

23 <sup>10</sup> Department of Health, Medicine, and Caring Sciences, Linköping University, Linköping, Sweden

24 <sup>11</sup> Department of Psychiatry and Psychotherapy, University of Tübingen, Germany

25 <sup>12</sup> CatoSenteret Rehabilitation Center, Son, Norway

26 <sup>13</sup> NOTE: This preprint reports new research that has not been certified by peer review and should not be used to guide clinical practice.  
KG Jebsen Centre for Neurodevelopmental Disorders, University of Oslo

27

28 \* Corresponding authors: Dani Beck ([dani.beck@psykologi.uio.no](mailto:dani.beck@psykologi.uio.no)) & Lars T. Westlye

29 ([l.t.westlye@psykologi.uio.no](mailto:l.t.westlye@psykologi.uio.no)), Department of Psychology, University of Oslo, PoBox 1094

30 Blindern, 0317 OSLO, Norway, phone: +47 22845000, Fax: +47 22845001

31

32

33

34

35

36

37

38

39

40

41

42

43

44

45

46

47

48

49

50

51

52

53

54

55

56

57

58

59 **Abstract**

60 There is an intimate body-brain connection in ageing, and obesity is a key risk factor for poor  
61 cardiometabolic health and neurodegenerative conditions. Although research has demonstrated  
62 deleterious effects of obesity on brain structure and function, the majority of studies have used  
63 conventional measures such as waist-to-hip ratio, waist circumference, and body mass index. While  
64 sensitive to gross features of body composition, such global anthropomorphic features fail to describe  
65 regional differences in body fat distribution and composition, and to determine visceral adiposity,  
66 which is related to a range of metabolic conditions. In this mixed cross-sectional and longitudinal  
67 design (interval mean and standard deviation =  $19.7 \pm 0.5$  months), including 790 healthy individuals  
68 (mean (range) age = 46.7 (18-94) years, 53% women), we investigated cross-sectional body magnetic  
69 resonance imaging (MRI, n = 286) measures of adipose tissue distribution in relation to longitudinal  
70 brain structure using MRI-based morphometry and diffusion tensor imaging (DTI). We estimated  
71 tissue-specific brain age at two time points and performed Bayesian multilevel modelling to  
72 investigate the associations between adipose measures at follow-up and brain age gap (BAG) at  
73 baseline and follow-up. We also tested for interactions between BAG and both time and age on each  
74 adipose measure. The results showed credible associations between T1-based BAG and liver fat,  
75 muscle fat infiltration (MFI), and weight-to-muscle ratio (WMR), indicating older-appearing brains  
76 in people with higher measures of adipose tissue. Longitudinal evidence supported interaction effects  
77 between time and MFI and WMR on T1-based BAG, indicating accelerated ageing over the course of  
78 the study period in people with higher measures of adipose tissue. The results show that specific  
79 measures of fat distribution are associated with brain ageing and that different compartments of  
80 adipose tissue may be differentially linked with increased brain ageing, with potential to identify key  
81 processes involved in age-related transdiagnostic disease processes.

82

83

84 *Key words:* Adipose tissue, Obesity, T1 MRI, DTI, Brain age

## 85 1. Introduction

86 An increasing body of evidence supports close body-brain connections in ageing, with  
87 cardiovascular disease (CVD), cognitive decline, and dementia sharing various  
88 cardiometabolic risk factors (Qiu & Fratiglioni, 2015). Among these, obesity subsists as a  
89 key risk factor (Bhupathiraju & Hu, 2016; Luppino et al., 2010), with evidence extending the  
90 links to include mental disorders (Bahrami et al., 2020; Ditmars et al., 2021; Luppino et al.,  
91 2010; Perry et al., 2021; Quintana et al., 2017; Rajan & Menon, 2017; Ringen et al., 2018;  
92 Scott et al., 2008) and age-related neurocognitive and neurological conditions including  
93 dementia and stroke (Anstey et al., 2011; Strazzullo et al., 2010).

94 Higher adipose tissue levels as indexed by waist circumference (WC), waist-to-hip  
95 ratio (WHR), body mass index (BMI), and increased subcutaneous (ASAT) and visceral  
96 (VAT) adipose tissue measures have all been associated with global brain volume decreases  
97 (Debette & Markus, 2010; Gunstad et al., 2005; Mulugeta et al., 2021; Ward et al., 2005).  
98 Moreover, regional findings have consistently shown negative associations between obesity  
99 and brain grey matter volume (Gurholt et al., 2020; Pannacciulli et al., 2006; Taki et al.,  
100 2008; Walther et al., 2010) and white matter microstructure, including reduced white matter  
101 tract coherence (Friedman et al., 2014; Willette & Kapogiannis, 2015), white matter integrity  
102 (Marks et al., 2011; Stanek et al., 2011; Xu et al., 2013), microstructural changes in  
103 childhood (Rapuano et al., 2020), and increased axonal and myelin damage (Mueller et al.,  
104 2011; Xu et al., 2013) based on diffusion MRI. White matter volumetric studies have  
105 revealed less consistent findings, reporting both positive (Walther et al., 2010), negative (Raji  
106 et al., 2010) and no (Gunstad et al., 2005) significant associations between brain white matter  
107 volume and adiposity.

108 While there is a wealth of research focusing on conventional anthropomorphic  
109 measures such as BMI, not all individuals with a higher BMI have the same disease risks  
110 (Mulugeta et al., 2021). A study assessing 27,000 individuals from 52 countries identified  
111 abdominal obesity as one of nine key risk factors that accounted for most of the risk of  
112 myocardial infarction worldwide (Yusuf et al., 2004). However, while some obese  
113 individuals develop health problems such as lipid abnormalities and type 2 diabetes (Lacobini  
114 et al., 2019), others are metabolically healthy. Partly motivated by this heterogeneity and  
115 complexity of fat distribution and cardiometabolic health, body MRI has recently emerged as  
116 a novel opportunity to investigate adipose tissue distribution beyond anthropomorphic  
117 measures (Linge et al., 2018, 2019, 2020, 2021).

118 Research utilising body MRI has found associations between visceral adiposity tissue  
119 (VAT) and muscle fat infiltration (MFI) and coronary heart disease (CHD) and type 2  
120 diabetes (T2D) (Linge et al., 2018). Moreover, higher liver fat has been associated with T2D  
121 and lower liver fat with CHD (Linge et al., 2018). Cross-sectional analyses investigating  
122 body and brain MRI associations have reported negative associations between liver fat, MFI  
123 and cerebral cortical thickness while thigh muscle volume was positively associated with  
124 brain stem and accumbens volumes (Gurholt et al., 2020).

125 Advanced multimodal brain MRI provides a wealth of information reflecting  
126 structural and functional characteristics of the brain. Brain age prediction using machine  
127 learning and a combination of MRI features provides a reliable approach for reducing the  
128 complexity and dimensionality of imaging data. The difference between the brain-predicted  
129 age and an individual's chronological age, also referred to as the brain age gap (BAG), can be  
130 used to assess deviations from expected age trajectories, with potential utility in studies of  
131 brain disorders and ageing (Cole et al., 2017; Kaufmann et al., 2019). This has clear clinical  
132 implications for patient groups, where studies have reported larger brain age gaps in patients  
133 with various neurological and psychiatric disorders (Han et al., 2020; Høgestøl et al., 2019;  
134 Kaufmann et al., 2019; Pardoe et al., 2017; Sone et al., 2019; Tønnesen et al., 2020).

135 Recent evidence has demonstrated that the rate of brain ageing may be dependent on a  
136 range of life events and lifestyle factors (Cole, 2020; Sanders et al., 2021), and characteristics  
137 related to cardiovascular health and obesity, including WHR and BMI (Beck et al., 2021b; de  
138 Lange et al., 2020; Franke et al., 2014; Kolbeinsson et al., 2020; Kolenic et al., 2018; Ronan  
139 et al., 2016).

140 In the current study, our primary aim was to identify interactions between adipose  
141 tissue measures based on body MRI and tissue specific (DTI and T1-weighted) measures of  
142 brain age. We investigated cross-sectional associations of tissue specific BAG and detailed  
143 adipose tissue measures (body composition) and, for comparison, conventional  
144 anthropomorphic measures (BMI and WHR) used in a recent study (Beck et al., 2021b).  
145 Next, we tested for associations between longitudinal brain age and body composition at  
146 follow-up and investigated associations between each adiposity measure and longitudinal  
147 BAG. Adopting a Bayesian statistical framework, we hypothesised that higher abdominal fat  
148 ratio, weight-to-muscle ratio, total (abdominal) adipose volume, visceral fat index, muscle fat  
149 infiltration, and liver fat percentage would be associated with older appearing brains, with  
150 stronger associations in the body MRI measures than for traditional anthropomorphic

151 features. Further, we hypothesised that indices of obesity are associated with accelerated  
152 brain ageing as reflected in larger changes in BAG between baseline and follow-up.

153

## 154 **2. Material and methods**

### 155 **2.1. Sample description**

156 Two integrated studies - the Thematically Organised Psychosis (TOP) (Tønnesen et al., 2018)  
157 and StrokeMRI (Richard et al., 2018) - formed the initial sample, which included 1130  
158 datasets from 832 healthy participants. All procedures were conducted in line with the  
159 Declaration of Helsinki and the study has been approved by the Norwegian Regional  
160 Committees for Medical and Health Research Ethics (REC). All participants provided written  
161 informed consent, and exclusion criteria included neurological and mental disorders, and  
162 previous head trauma.

163       Following the removal of 68 datasets after quality checking (QC) of the MRI data  
164 (see section 2.5), the final sample included 1062 brain MRI datasets collected from 790  
165 healthy participants aged 18-94 years (mean  $\pm$  standard deviation (SD) at baseline:  $46.8 \pm$   
166  $16.3$ ). This included longitudinal data (two time-points with 19.7 months interval, on average  
167 (min = 9.8, max = 35.6) from 272 participants. Of the 790 included participants, body MRI  
168 data was available from a subgroup of 286 participants, with age range 19-86 (mean = 57.6,  
169 SD = 15.6). Demographic information is summarised in Table 1 and Figure 1.

170       An independent training sample from the Cambridge Centre for Ageing and  
171 Neuroscience (Cam-CAN: <http://www.mrc-cbu.cam.ac.uk/datasets/camcan/>; Shafto et al.,  
172 2014; Taylor et al., 2017) was used for brain age prediction (section 2.6). After QC, MRI data  
173 from 622 participants were included (age range = 18–87, mean age  $\pm$  standard deviation =  
174  $54.2 \pm 18.4$ ).

**Table 1.** Descriptive characteristics of the study sample.

|                                                                 | <b>Baseline<br/>brain MRI</b> | <b>Follow-up<br/>brain MRI</b> | <b>Body MRI</b>  | <b>Males at<br/>baseline</b> | <b>Females at<br/>baseline</b> | <b>Males at<br/>follow-up</b> | <b>Females at<br/>follow-up</b> |
|-----------------------------------------------------------------|-------------------------------|--------------------------------|------------------|------------------------------|--------------------------------|-------------------------------|---------------------------------|
| <b><i>N</i> subjects</b>                                        | 790                           | 272                            | 286              | 372 (47.1%)                  | 418 (52.9%)                    | 106 (39%)                     | 166 (61%)                       |
| <b>Sex (Males/Females)</b>                                      | 372/418                       | 106/166                        | 110/176          | 372/0                        | 0/418                          | 106/0                         | 0/166                           |
| <b>Age (mean <math>\pm</math> SD)</b>                           | 46.7 $\pm$ 16.3               | 56.9 $\pm$ 15.0                | 57.6 $\pm$ 15.6  | 45.4 $\pm$ 16.3              | 48.0 $\pm$ 16.3                | 56.7 $\pm$ 16.9               | 57.1 $\pm$ 13.6                 |
| <b>Predicted Age T1</b>                                         | 46.6 $\pm$ 17.4               | 56.7 $\pm$ 16.8                | 57.8 $\pm$ 17.7  | 44.6 $\pm$ 16.8              | 48.4 $\pm$ 17.3                | 55.3 $\pm$ 17.9               | 57.6 $\pm$ 16.0                 |
| <b>Predicted Age DTI</b>                                        | 46.5 $\pm$ 16.9               | 57.0 $\pm$ 15.9                | 58.2 $\pm$ 16.9  | 46.9 $\pm$ 16.7              | 47.1 $\pm$ 17.0                | 57.7 $\pm$ 17.3               | 56.6 $\pm$ 15.0                 |
| <b>BAG T1</b>                                                   | -0.15 $\pm$ 6.4               | -0.23 $\pm$ 6.9                | 0.2 $\pm$ 6.9    | -0.8 $\pm$ 5.9               | 0.5 $\pm$ 6.9                  | -1.41 $\pm$ 6.4               | 0.53 $\pm$ 7.2                  |
| <b>BAG DTI</b>                                                  | -0.2 $\pm$ 5.1                | 0.05 $\pm$ 0.9                 | 0.5 $\pm$ 5.4    | 0-5 $\pm$ 5.1                | -0.9 $\pm$ 5.0                 | 0.92 $\pm$ 5.0                | -0.51 $\pm$ 5.4                 |
| <b>BMI, kg/m<sup>2</sup></b>                                    | 25.2 $\pm$ 4.06               | 25.0 $\pm$ 3.7                 |                  | 25.6 $\pm$ 3.7               | 24.8 $\pm$ 4.3                 | 25.3 $\pm$ 2.9                | 25.3 $\pm$ 4.4                  |
| <b>Waist-to-hip ratio (WHR)</b>                                 | 0.87 $\pm$ 0.09               | 0.9 $\pm$ 0.09                 |                  | 0.91 $\pm$ 0.1               | 0.83 $\pm$ 0.1                 | 0.93 $\pm$ 0.07               | 0.86 $\pm$ 0.08                 |
| <b>Visceral adipose tissue (VAT)<br/>(min-max)</b>              |                               |                                | 2.7 (0.4-9.2)    | 3.7 (0.6-9.2)                | 2.2 (0.4-5.5)                  |                               |                                 |
| <b>Abdominal subcutaneous<br/>adipose tissue (ASAT)</b>         |                               |                                | 6.3 (1.1-19.7)   | 4.9 (1.5-13.4)               | 7.1 (1.1-19.8)                 |                               |                                 |
| <b>Thigh muscle volume (TMV)</b>                                |                               |                                | 2.6 (0.6-1.5)    | 3.3 (2.3-4.2)                | 2.2 (1.5-3.3)                  |                               |                                 |
| <b>Weight-to-muscle ratio (WMR)</b>                             |                               |                                | 29.3 (12.0-82.5) | 25.6 (19.4-33.9)             | 31.7 (12.0-82.5)               |                               |                                 |
| <b>Liver PDFF (Liver fat)</b>                                   |                               |                                | 4.3 (1.1-29.8)   | 4.9 (1.1-29.8)               | 3.9 (1.24-27.8)                |                               |                                 |
| <b>Fat ratio</b>                                                |                               |                                | 74.5 (34.9-90.5) | 70.0 (34.9-84.7)             | 77.5 (42.7-90.5)               |                               |                                 |
| <b>Visceral abdominal adipose<br/>tissue index (VAT index)</b>  |                               |                                | 0.9 (0.14-2.9)   | 1.1 (0.2-2.9)                | 0.8 (0.14-2.0)                 |                               |                                 |
| <b>Total abdominal adipose tissue<br/>index (Total adipose)</b> |                               |                                | 3.0 (0.51-8.5)   | 2.6 (0.57-5.3)               | 3.3 (0.51-8.5)                 |                               |                                 |
| <b>Muscle fat infiltration (MFI)</b>                            |                               |                                | 7.6 (3.6-17.2)   | 6.9 (3.6-12.8)               | 8.3 (4.5-17.2)                 |                               |                                 |

175

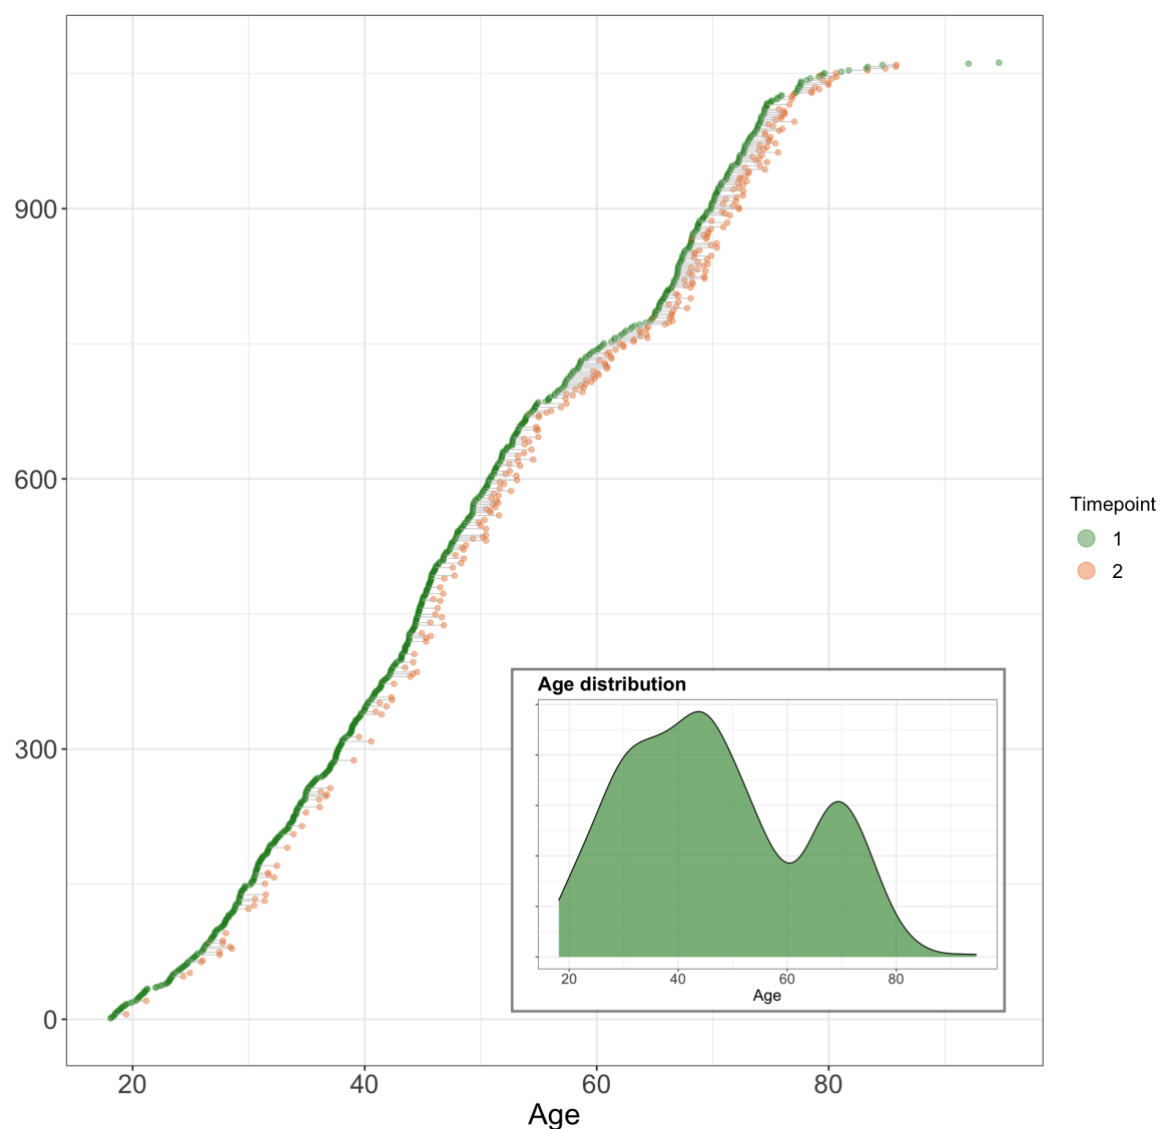

176

177 **Figure 1. Available baseline and follow-up data.** All participants are shown. Participants with data at baseline  
178 are visualised in green dots (N = 790). Of these participants, those with longitudinal measures of brain MRI are  
179 connected to corresponding timepoint two orange dots (N = 272). The y axis shows index which reorders data to  
180 sort by age at first timepoint. Subplot shows density of age distribution at baseline.

181

## 182 **2.2. MRI acquisition**

183 MRI was performed at Oslo University Hospital, Norway, on a GE Discovery MR750 3T  
184 scanner. Brain MRI was collected with a 32-channel head coil. T1-weighted data were  
185 acquired with a 32-channel head coil using a 3D inversion recovery prepared fast spoiled  
186 gradient recalled sequence (IR-FSPGR; BRAVO) with the following parameters: TR: 8.16  
187 ms, TE: 3.18 ms, flip angle: 12°, voxel size: 1×1×1 mm<sup>3</sup>, FOV: 256 × 256 mm<sup>2</sup>, 188 sagittal  
188 slices, scan time: 4:43 min. DTI data were acquired with a spin echo planar imaging (EPI)



189 sequence with the following parameters: repetition time (TR)/echo time (TE)/flip angle: 150  
190 ms/83.1 ms/90°, FOV: 256 × 256 mm<sup>2</sup>, slice thickness: 2 mm, in-plane resolution: 2×2 mm,  
191 60 non-coplanar directions ( $b = 1000$  s/mm<sup>2</sup>) and 5  $b = 0$  volumes, scan time: 8:58 min. In  
192 addition, 7  $b = 0$  volumes with reversed phase-encoding direction were acquired.

193 Body MRI was performed with a single-slice 3D dual-echo LAVA Flex pulse  
194 sequence to acquire water and fat separated volumetric data covering head to knees. The  
195 following parameters were used: TE: minimum, flip angle: 10°, FOV: 50 x 50 mm, slice  
196 thickness: 5 mm, scan time: 2:32 min. For proton density fat fraction (PDFF) assessment in  
197 the liver, a single-slice 3D multi-echo IDEAL IQ pulse sequence was used with the following  
198 parameters: TE: minimum, flip angle: 3°, FOV: 45 x 45 mm<sup>2</sup>, slice thickness: 8 mm, scan  
199 time: 0:22 min.

200 The Cam-CAN training set participants were scanned on a 3T Siemens TIM Trio  
201 scanner with a 32- channel head-coil at Medical Research Council (UK) Cognition and Brain  
202 Sciences Unit (MRC-CBSU) in Cambridge, UK. High-resolution 3D T1-weighted data was  
203 collected using a magnetisation prepared rapid gradient echo (MPRAGE) sequence with the  
204 following parameters: TR: 2250 ms, TE: 2.99 ms, inversion time (TI): 900 ms, flip angle: 9°,  
205 FOV of 256 × 240 × 192 mm; voxel size = 1×1×1 mm, GRAPPA acceleration factor of 2,  
206 scan time 4:32 min (Dixon et al., 2014). DTI data was acquired using a twice-refocused spin  
207 echo sequence with the following parameters: TR: 9100 ms, TE: 104 ms, FOV: 192 × 192  
208 mm, voxel size: 2 mm, 66 axial slices using 30 directions with  $b = 1000$  s/mm<sup>2</sup>, 30 directions  
209 with  $b = 2000$  s/mm<sup>2</sup>, and 3  $b = 0$  images (Dixon et al., 2014).

210

### 211 **2.3. DTI processing and TBSS analysis**

212 Processing steps for single-shell diffusion MRI data in the test set followed a previously  
213 described pipeline (Maximov et al., 2019), including noise correction (Veraart et al., 2016),  
214 Gibbs ringing correction (Kellner et al., 2016), corrections for susceptibility induced  
215 distortions, head movements and eddy current induced distortions using topup  
216 (<http://fsl.fmrib.ox.ac.uk/fsl/fslwiki/topup>) and eddy  
217 (<http://fsl.fmrib.ox.ac.uk/fsl/fslwiki/eddy>) (Andersson & Sotiropoulos, 2016). Isotropic  
218 smoothing was carried out with a Gaussian kernel of 1 mm<sup>3</sup> implemented in the FSL  
219 function *fslmaths*. DTI metrics were estimated using *dtifit* in FSL and a weighted least  
220 squares algorithm. Processing steps for the training set followed a similar pipeline with the  
221 exception of the noise correction procedure.

222           Voxelwise analysis of the fractional anisotropy (FA) data was carried out using Tract-  
223 Based Spatial Statistics (TBSS) (Smith et al., 2006), as part of FSL (Smith et al., 2004). First,  
224 FA images were brain-extracted using BET (Smith, 2002) and aligned into a common space  
225 (FMRI58\_FA template) using the nonlinear registration tool FNIRT (Andersson, Jenkinson,  
226 & Smith., 2007; Jenkinson et al., 2012), which uses a b-spline representation of the  
227 registration warp field (Rueckert et al., 1999). Next, the mean FA volume of all subjects was  
228 created and thinned to create a mean FA skeleton that represents the centres of all tracts  
229 common to the group. Each subject's aligned FA data was then projected onto this skeleton.  
230 The mean FA skeleton was thresholded at  $FA > 0.2$ . This procedure was repeated in order to  
231 extract axial diffusivity (AD), mean diffusivity (MD), and radial diffusivity (RD). *fslmeants*  
232 was used to extract the mean skeleton and 20 regions of interest (ROI) based on a  
233 probabilistic white matter atlas (JHU) (Hua et al., 2008) for each metric. Including the mean  
234 skeleton values, 276 features per individual were derived in total.

235

#### 236 **2.4. FreeSurfer processing**

237 T1-weighted MRI data were processed using FreeSurfer (Fischl, 2012) version 7.1.0 for the  
238 test set and version FreeSurfer version 5.3 for the training set. To extract reliable area,  
239 volume and thickness estimates, the test set including follow-up data were processed with the  
240 longitudinal stream (Reuter et al., 2012) in FreeSurfer. Specifically, an unbiased within-  
241 subject template space and image (Reuter & Fischl, 2011) is created using robust, inverse  
242 consistent registration (Reuter et al., 2010). Several processing steps, such as skull stripping,  
243 Talairach transforms, atlas registration as well as spherical surface maps and parcellations are  
244 then initialized with common information from the within-subject template, significantly  
245 increasing reliability and statistical power (Reuter et al., 2012). Due to the longitudinal  
246 stream in FreeSurfer influencing the thickness estimates, and subsequently having an impact  
247 on brain age prediction (Høgestøl et al., 2019), both cross-sectional and longitudinal data in  
248 the test set were processed with the longitudinal stream. All reconstructions were visually  
249 assessed and edited by trained research personnel. Cortical parcellation was performed using  
250 the Desikan-Killiany atlas (Desikan et al., 2006), and subcortical segmentation was  
251 performed using a probabilistic atlas (Fischl et al., 2002). 269 FreeSurfer based features were  
252 extracted in total, including global features for intracranial volume, total surface area, and  
253 whole cortex mean thickness, as well as the volume of subcortical structures.

254

#### 255 **2.5. Quality control (QC) procedure**

256 A detailed description of the complete QC procedure for the final sample is available in  
257 (Beck et al., 2021b). Briefly, for DTI we derived various QC metrics (see Supplementary  
258 material; SI Table 1), including temporal signal-to-noise-ratio (tSNR) (Roalf et al., 2016) to  
259 flag data deemed to have unsatisfactory quality. For T1-weighted data, QC was carried out  
260 using the ENIGMA cortical QC protocol including three major steps: outlier detection,  
261 internal surface method, and external surface method. Following the removal of datasets with  
262 inadequate quality ( $n = 30$ ), the separate T1 and DTI datasets were merged with BMI and  
263 WHR measures, leaving the final sample used for the study at  $N = 1062$  datasets from 790  
264 individuals, among which  $N = 286$  had body MRI data available.

265 Body MRI QC was carried out using a multivariate outlier detection algorithm, where  
266 anomalies in the data are detected as observations that do not conform to an expected pattern  
267 to other items. Using the R package *mvoutlier* (Filzmoser et al., 2005), potential outliers were  
268 flagged using the Mahalanobis distance (SI Figures 1 and 2). Informed by an interactive plot  
269 using the *chisq.plot* function, manual outlier observations of each of these flagged values  
270 deemed none of them as true outliers, leading to no further removal from the initial 286 body  
271 MRI dataset.

272

## 273 **2.6 Brain age prediction**

274 We performed brain age prediction using T1-weighted and DTI data using XGBoost  
275 regression (<https://xgboost.readthedocs.io/en/latest/python>), which is based on a decision-tree  
276 ensemble algorithm used in several recent brain age prediction studies (Beck et al., 2021b; de  
277 Lange et al., 2019, 2020; Kaufmann et al., 2019; Richard et al., 2020). BAG was calculated  
278 using (predicted age- chronological age) for each of the models, providing T1 and DTI-based  
279 BAG values for each individual. The BAG estimates were residualised for age to account for  
280 age-bias (de Lange & Cole, 2020; Liang et al., 2019).

281

## 282 **2.7. Adipose tissue measures**

283 For body MRI measures of adipose tissue distribution, missing entries were identified (SI  
284 Figure 3) before being imputed using the *MICE* package (van Buuren & Groothuis-  
285 Oudshoorn, 2011) in R, where five imputations were carried out using the predictive mean  
286 matching method (package default). The distribution of the original and imputed data was  
287 inspected (SI Figure 4) and the imputed data were deemed as plausible values. Of the five  
288 imputations, the first was used for the remainder of the study.

289 To investigate the associations between the adipose tissue measures, hierarchical  
290 clustering of the variables was performed using *hclust*, part of the *stats* package in R (R Core  
291 Team, 2012), which uses the complete linkage method to form clusters. Five cluster groups  
292 were revealed. Principle component analysis (PCA) was performed using *prcomp*, part of the  
293 *stats* package in R (R Core Team, 2012), to visualise the variation present in the dataset. The  
294 PCA-derived scree plot (SI Figure 5) revealed that 79.4% of the variance was explained by  
295 the first two dimensions. SI Figure 6 provides a visualisation of the hierarchical clustering  
296 and SI Figure 7 provides a graph of PCA variables relatedness.

297 Informed by the cluster formations and PCA, left and right anterior and posterior  
298 thigh muscle and fat infiltration volumes were combined to form two average measures of  
299 thigh muscle volume and thigh muscle fat percentage. Moreover, raw data was converted to  
300 body composition features following calculations provided in (Linge et al., 2018). The final  
301 adipose tissue measures included liver fat, describing the PDFFF in the liver; visceral adipose  
302 tissue index (VAT index), which is VAT normalised by height<sup>2</sup>, describing the intra-  
303 abdominal fat surrounding the organs; total adipose, which is the total abdominal fat (VAT  
304 and ASAT) normalised by height<sup>2</sup>; weight-to-muscle ratio (WMR), which is body weight  
305 divided by thigh muscle volume; fat ratio, which is the total abdominal fat divided by total  
306 abdominal fat and thigh muscle volume; and muscle fat infiltration (MFI). Figure 2 shows the  
307 body MRI for two participants. Figure 4 shows the associations between the adiposity  
308 measures in a network correlation graph, created using the *qgraph* (Epskamp et al., 2012) R  
309 package. For a correlation matrix of adiposity measures see SI Figure 8.

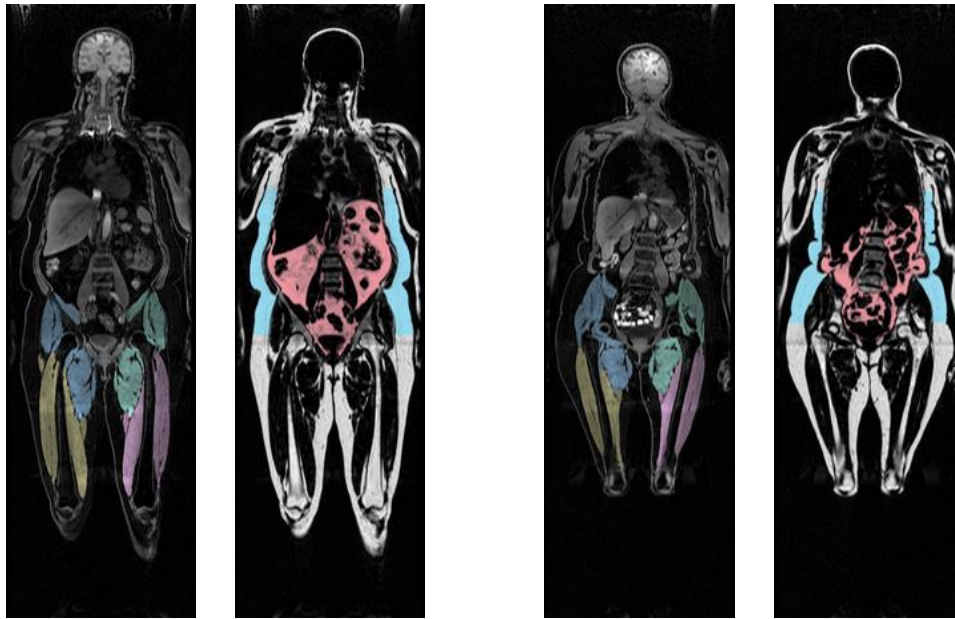

310

311 **Figure 2. Body MRI.** Showing two participants with a coronal slice from their MRI scan with VAT (pink) and  
312 ASAT (blue), and thigh muscle segmentations.

313

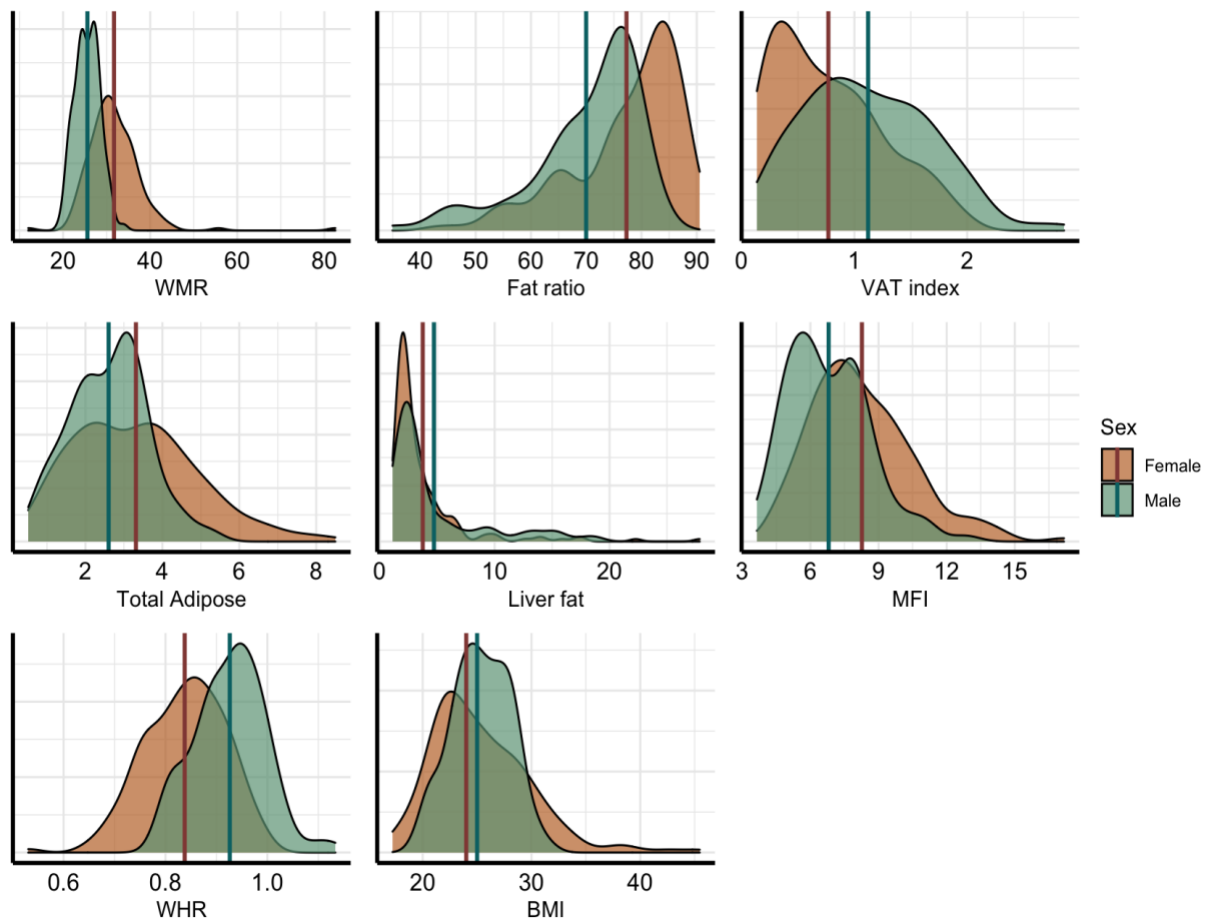

314

315 **Figure 3. Distribution of the adiposity measures.** Density plots for each variable, split by sex (male = green,  
316 female = orange). Vertical lines represent mean values for each sex.

317

## 318 **2.8. Statistical analysis**

319 All statistical analyses were performed using R, version 3.6.0 ([www.r-project.org/](http://www.r-project.org/)) (R Core  
320 Team, 2012). Bayesian multilevel models were carried out in *Stan* (Stan Development Team,  
321 2019) using the *brms* (Bürkner, 2017, 2018) package. For descriptive purposes, we tested  
322 associations between each adiposity measure and age. Each adiposity measure was entered as  
323 the dependent variable while age was entered as the independent fixed effects along with sex  
324 and time.

325 To address the primary aim of the study, we tested for associations between tissue  
326 specific BAG and each adiposity measure. BAG (for T1 and DTI separately) was entered as  
327 the dependent variable with each adiposity measure separately entered as the independent  
328 fixed effects variable along with age, sex, and time.

329 To test our hypothesis that adiposity influences brain ageing we tested for  
330 associations between longitudinal changes in BAG and body MRI measures at follow-up  
331 using Bayesian multilevel models. Similarly, we tested for interactions between age and  
332 adiposity measures on BAG. For each of the models, timepoint and age were included in the  
333 models where appropriate, while sex was added to both models.

334 In order to prevent false positives and to regularize the estimated associations we  
335 defined a standard prior around zero with a standard deviation of 1 for all coefficients. For  
336 each coefficient of interest, we report the mean estimated value and its uncertainty measured  
337 by the 95% credible interval of the posterior distribution, and calculated Bayes factors (BF)  
338 using the Savage-Dickey method (Wagenmakers et al., 2010). For a pragmatic guide on  
339 Bayes factor (BF) interpretation, see SI Table 2.

340

## 341 **3. Results**

### 342 **3.1. Brain age prediction**

343 SI Table 3 summarises age prediction accuracy in the training and test sets. Briefly, the  
344 models revealed high accuracy, as previously reported (Beck et al., 2021b), with  $R^2 = 0.72$   
345 and 0.73 for the T1 and DTI models, respectively.

346

### 347 **3.2. Adiposity measures and brain age gap**

#### 348 **3.2.1. Descriptive statistics**

349 Table 1 shows descriptive statistics, Figure 3 shows the distributions within women and men  
350 for each adiposity measure, and Figure 5 shows the correlations between adiposity measures  
351 for women and men.

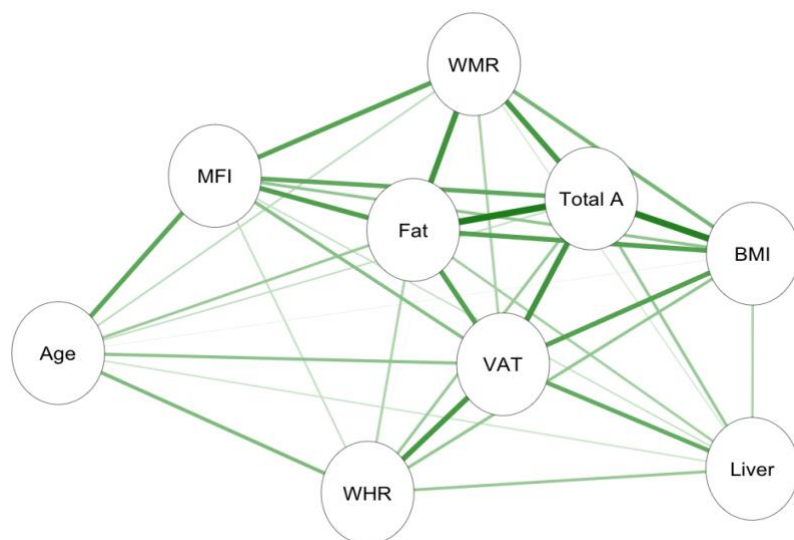

352  
 353 **Figure 4. Associations between adiposity measures.** Network correlation graph showing correlations between  
 354 adiposity measures and age, where the green lines indicate positive associations, and orange lines (none present)  
 355 indicate negative associations. Strength of association marked by thickness of each line, with the thickest line  
 356 shown equating to  $r = 0.86$ . Abbreviations: MFI – muscle fat infiltration; Fat – fat ratio; WHR – waist-to-hip  
 357 ratio; VAT – visceral abdominal tissue index; WMR – weight-to-muscle ratio; Total A – total adipose; BMI –  
 358 body-mass index; Liver – liver fat.  
 359

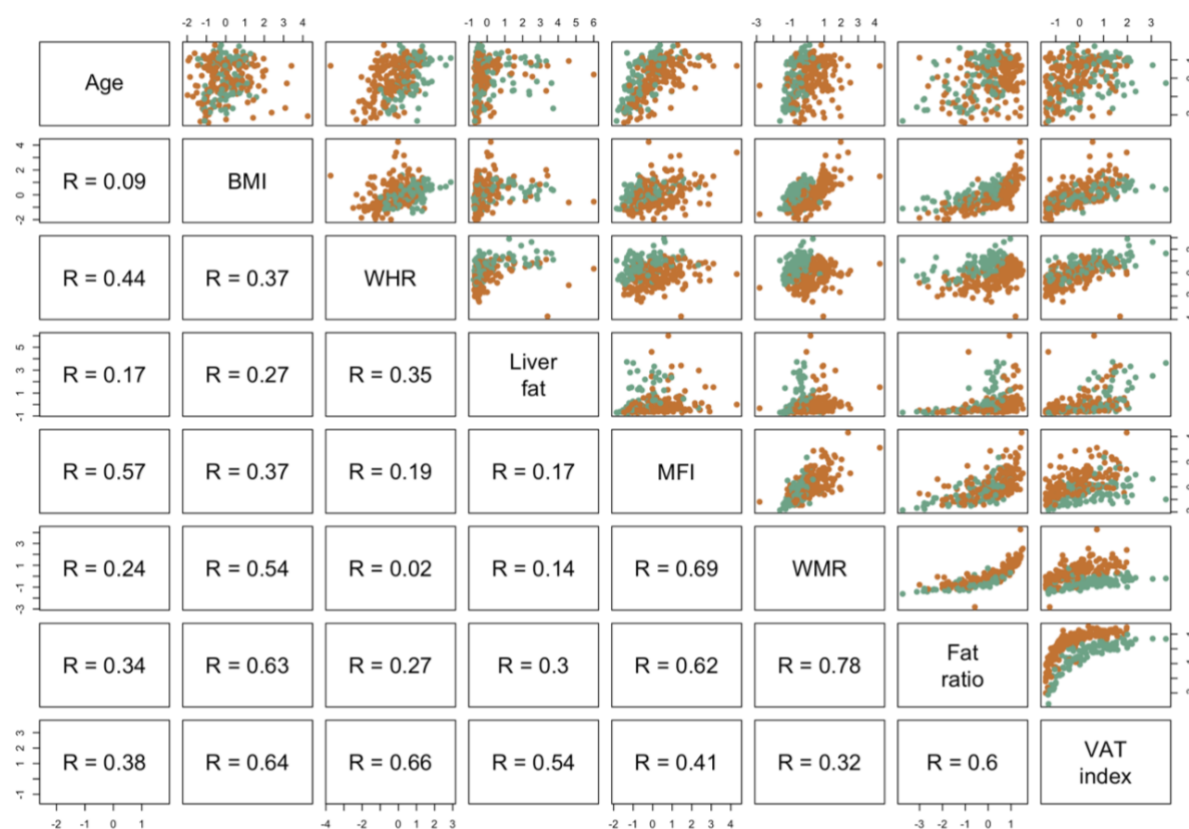

360  
 361 **Figure 5. Associations between adiposity measures (and age) split by sex.** Scatter plot matrix showing  
 362 Pearson correlations between adiposity measures. Green points represent males, orange points represent  
 363 females.

364

### 365 3.3. Bayesian multilevel models

#### 366 3.3.1. Descriptive results

367 For descriptive purposes, associations between each adiposity measure and age were tested.

368 Results are summarised in the Supplementary Material, including visualisation of reported

369 effects (SI Figures 9-10).

370

#### 371 3.3.2. Associations between BAG and adiposity measure

372 Figure 7 shows posterior distributions of the estimates of the coefficients reflecting the

373 associations between each adiposity measure and BAGs, and Figure 8 shows credible

374 intervals and evidence ratios. SI Figure 11 shows network correlation graph of correlations

375 between adiposity measures and each BAG, and SI Table 5 provides summary statistics.

376 The tests revealed anecdotal evidence in favour of an association with DTI BAG for

377 fat ratio (BF = 0.91,  $\beta$  = -0.50), while moderate evidence in favour of no association was

378 revealed between DTI BAG and VAT index (BF = 3.12,  $\beta$  = -0.05), liver fat (BF = 2.90,  $\beta$  =

379 -0.13), and anecdotal evidence for WMR (BF = 2.73,  $\beta$  = -0.13), total adipose (BF = 2.02,  $\beta$  =

380 = -0.31), MFI (BF = 2.63,  $\beta$  = 0.17), WHR (BF = 1.92,  $\beta$  = 0.26), and BMI (BF = 2.62,  $\beta$  =

381 0.21).

382 Strong evidence in favour of an association with T1 BAG was provided for liver fat

383 (BF = 0.09,  $\beta$  = 1.0), with moderate evidence for MFI (BF = 0.17,  $\beta$  = 0.92), and anecdotal

384 evidence for WMR (BF = 0.40,  $\beta$  = 0.77). The tests revealed moderate evidence in favour of

385 no association between T1 BAG and WHR (BF = 3.40,  $\beta$  = 1.73), and BMI (BF = 3.47,  $\beta$  =

386 0.17), and anecdotal evidence for fat ratio (BF = 2.5,  $\beta$  = -0.12), total adipose (BF = 2.50,  $\beta$  =

387 0.09), VAT index (BF = 1.53,  $\beta$  = 0.40).

388

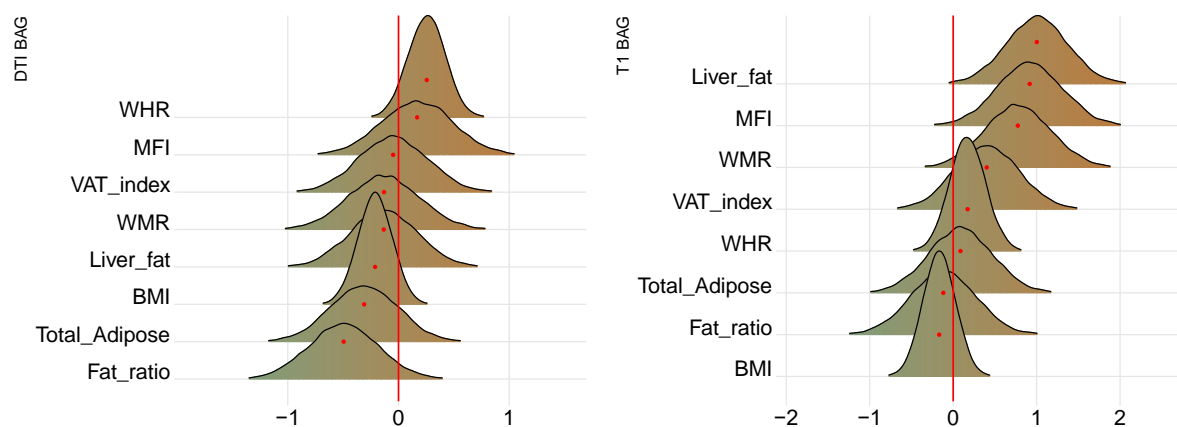

389



390 **Figure 6. Associations between adiposity and BAG.** The figure shows posterior distributions of the estimates  
391 of the standardised coefficient. Estimates for each variable on DTI BAG on the left and T1 BAG on the right.  
392 Colour scale follows direction evidence, with positive values indicating evidence in favour of an association and  
393 negative values evidence in favour of the null hypothesis. Width of distribution represents the uncertainty of the  
394 parameter estimates.  
395

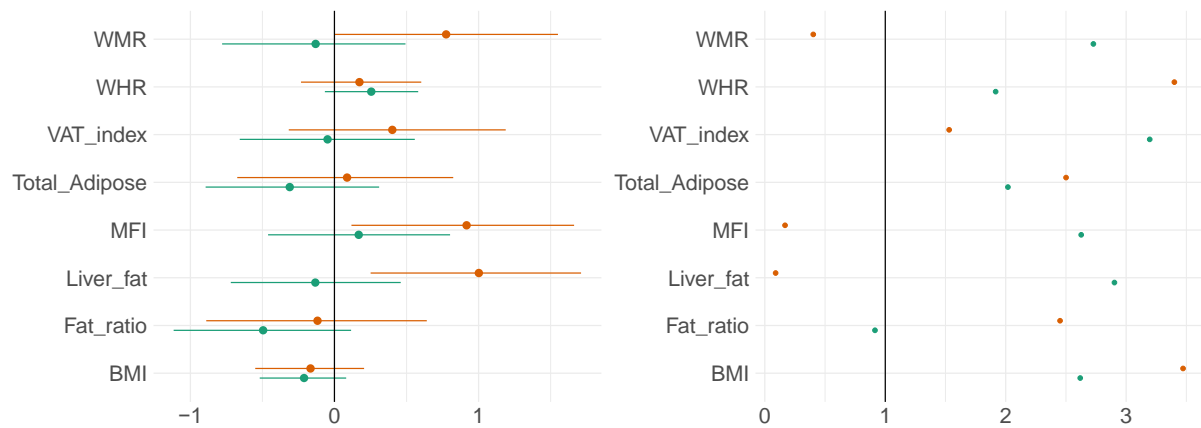

396  
397 **Figure 7. BAG and adiposity: Estimate credible intervals and evidence ratios.** Left-side plot shows  
398 estimates with 95% credible intervals while the right-side figure shows likelihood of null where values above  
399 one indicate evidence in favour of the effect being null, and values below one indicate evidence in favour of an  
400 effect. T1 BAG associations are represented by orange points, and DTI BAG by green points.  
401

### 402 3.3.3. Interaction effects of time and adiposity measure on brain age gap

403 Figure 9 shows posterior distributions of the estimates of the coefficient for the interaction  
404 between time and each adiposity measure and DTI and T1 BAGs, and Figure 10 shows  
405 credible intervals and evidence ratios. For full table of results see SI Table 5.

406 For DTI BAG, the evidence supporting an interaction with time was anecdotal for  
407 WHR (BF = 0.44,  $\beta$  = 0.39) (SI Figure 12). The models revealed moderate evidence in  
408 favour of no interaction with time for WMR (BF = 3.24,  $\beta$  = 0.02), fat ratio (BF = 3.12,  $\beta$  = -  
409 0.14), and BMI (BF = 3.43,  $\beta$  = 0.17), with anecdotal evidence for VAT index (BF = 2.93,  $\beta$   
410 = -0.13), total adipose (BF = 2.73,  $\beta$  = -0.21), liver fat (BF = 2.51,  $\beta$  = -0.21), and MFI (BF =  
411 1.41,  $\beta$  = 0.43).

412 For T1 BAG, the evidence supporting an interaction with time was moderate for  
413 WHR (BF = 0.30,  $\beta$  = 0.50) and MFI (BF = 0.29,  $\beta$  = 0.87), indicating faster pace of brain  
414 ageing among people with higher WHR and MFI (SI Figure 12). The models also revealed  
415 anecdotal evidence for WMR (BF = 0.57,  $\beta$  = 0.66). The evidence of no associations was  
416 anecdotal for fat ratio (BF = 1.72,  $\beta$  = 0.34), VAT index (BF = 1.49,  $\beta$  = 0.41), total adipose

417 (BF = 1.79,  $\beta = 0.34$ ), and liver fat (BF = 1.17,  $\beta = 0.53$ ), and moderate for BMI (BF = 3.35,  
 418  $\beta = 0.17$ ).

419

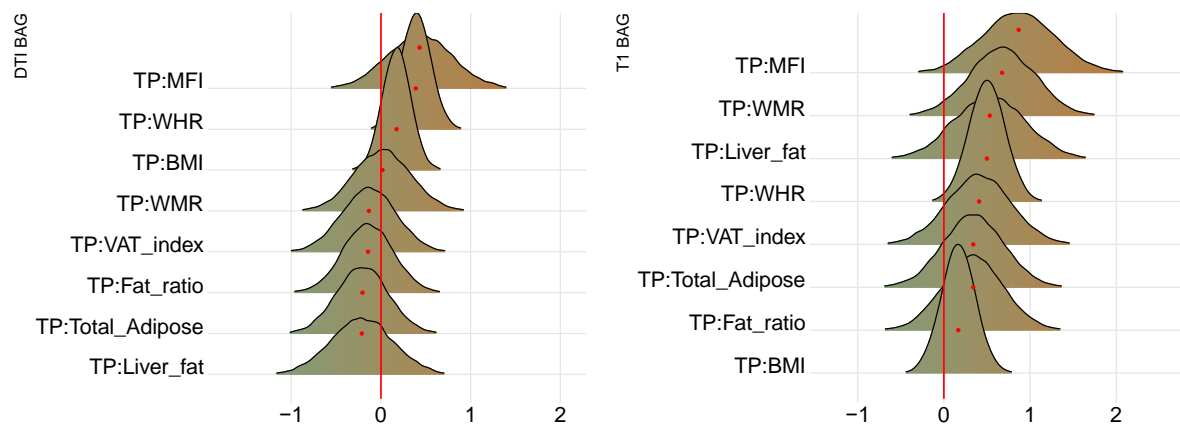

420

421 **Figure 8. Interaction effects between adiposity and time on BAG.** The figure shows posterior distributions of  
 422 the estimates of the standardised coefficient. Estimates for the interaction effect of time and each adiposity  
 423 measure on DTI BAG on the left and T1 BAG on the right.

424

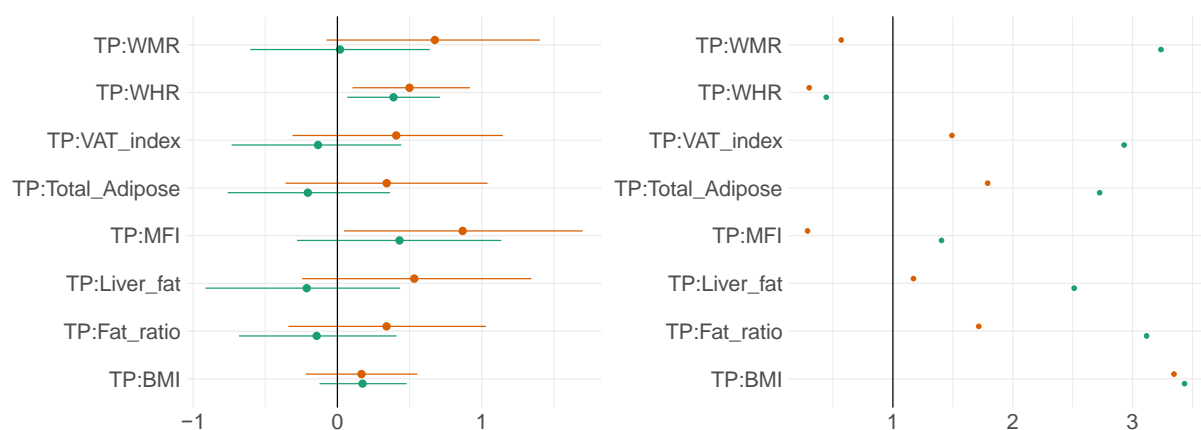

425

426 **Figure 9. Interaction effects between adiposity and time on BAG: Estimate credible intervals and**  
 427 **evidence ratios.** Left-side plot shows estimates with 95% credible intervals while the right-side figure shows  
 428 likelihood ratios. T1 BAG effects are represented by orange points, and DTI BAG by green points.

429

### 430 3.3.4. Interaction effects of age and adiposity measure on brain age gap

431 Figure 11 shows posterior distributions of the estimates of the coefficient for the interaction  
 432 between age and each adiposity measure and DTI and T1 BAGs, and Figure 12 shows  
 433 credible intervals and evidence ratios. For full table of reported results see SI Table 5.

434 The analysis provided anecdotal evidence in support of an interaction effect with age  
 435 on DTI BAG for WHR (BF = 0.44,  $\beta = 0.36$ ). Anecdotal evidence was also provided in  
 436 support of no interaction effect for WMR (BF = 1.92,  $\beta = 0.30$ ), liver fat (BF = 2.26,  $\beta =$   
 437 0.17), MFI (BF = 1.06,  $\beta = 0.49$ ), fat ratio (BF = 2.75,  $\beta = 0.18$ ), VAT index (BF = 2.29,  $\beta =$

438 0.22), and BMI (BF = 2.81,  $\beta$  = 0.21), with moderate evidence for total adipose (BF = 3.20,  $\beta$   
 439 = -0.01).

440 The support of an interaction effect with age on T1 BAG was very strong for WHR  
 441 (BF = 0.01,  $\beta$  = 0.68), and moderate for WMR (BF = 0.13,  $\beta$  = 1.00), fat ratio (BF = 0.24,  $\beta$   
 442 = 0.87), VAT index (BF = 0.24,  $\beta$  = 0.94), liver fat (BF = 0.25,  $\beta$  = 0.94), and MFI (BF =  
 443 0.12,  $\beta$  = 1.03), indicating these adiposity measures may be increasingly important predictors  
 444 of BAG with increasing age. The models further indicated anecdotal evidence for total  
 445 adipose (BF = 0.34,  $\beta$  = 0.76) and BMI (BF = 0.62,  $\beta$  = 0.42).

446

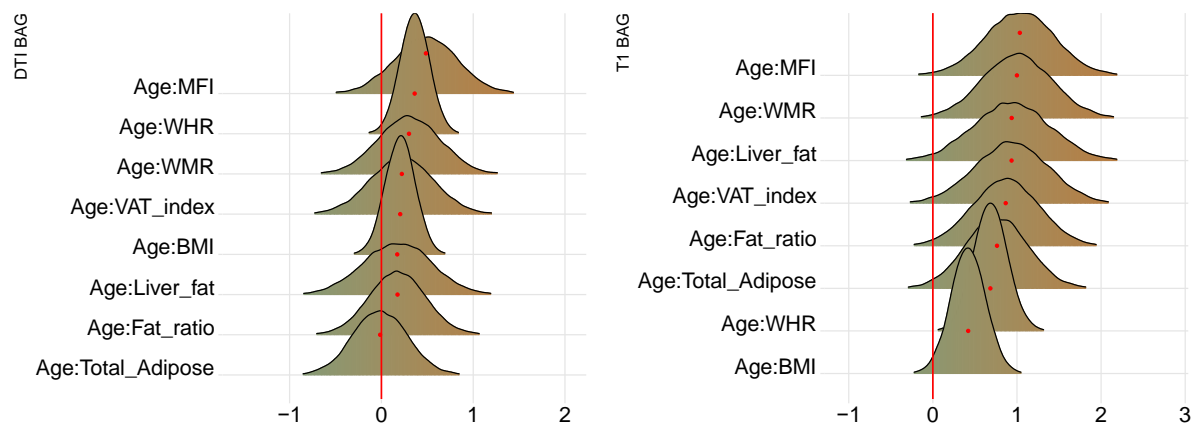

447

448 **Figure 10. Interaction effects between adiposity and age on BAG.** The figure shows posterior distributions of  
 449 the estimates for the interaction effect between age and each variable on DTI BAG on the left and T1 BAG on  
 450 the right.

451

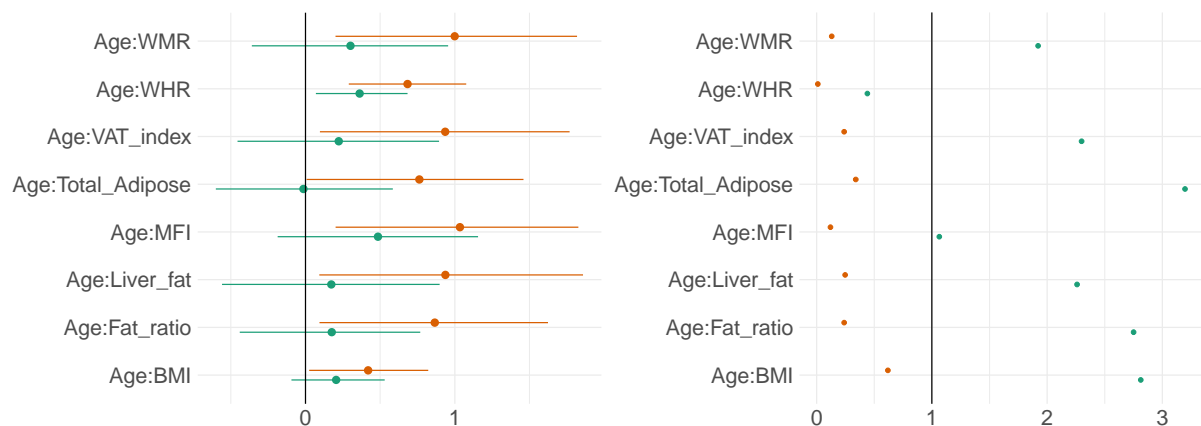

452

453 **Figure 11. Interaction effects between adiposity and age on BAG: Estimate credible intervals and**  
 454 **evidence ratios.** Left-side plot shows estimates with 95% credible intervals while the right-side figure shows  
 455 likelihood ratios. T1 BAG effects are represented by orange points, and DTI BAG by green points.

456

457 **4. Discussion**

458 Despite increasing evidence of shared mechanisms across several metabolic conditions and  
459 cardiovascular and neurodegenerative diseases, we are yet to fully understand the complex  
460 associations of adipose tissue and brain age. The current cross-sectional and longitudinal  
461 findings support that higher measures of adipose tissue – particularly higher liver fat and MFI  
462 – are associated with an older-appearing brain and faster brain ageing. Both overall brain age  
463 gap and the rates of change in brain age over time were associated with specific adipose  
464 tissue measures at follow-up, including thigh muscle fat infiltration, weight-to-muscle ratio,  
465 and liver fat.

466

#### 467 **4.1. Adiposity and brain age: cross-sectional analysis**

468 Our findings demonstrated associations between liver fat, MFI, WMR and T1 BAG,  
469 indicating older-appearing brains in individuals with higher adipose tissue measures. DTI  
470 BAG associations were less common, with evidence supporting no associations with VAT  
471 index and WHR. These findings are in line with the hypothesis that body MRI adipose tissue  
472 measures are associated with ageing of the brain as indicated by brain MRI morphology  
473 measures. Moreover, the findings extend previous work linking adiposity measures, including  
474 links to grey matter volume (Debette & Markus, 2010; Gunstad et al., 2005; Jørgensen et al.,  
475 2017; Ward et al., 2005) and white matter microstructural properties based on diffusion MRI  
476 (Marks et al., 2011; Mueller et al., 2011; Stanek et al., 2011; Xu et al., 2013), with conflicting  
477 evidence for white matter volume (Friedman et al., 2014; Willette & Kapogiannis, 2015). The  
478 discrepancy may be due to methodological differences, e.g. between previous regional  
479 associations and our global brain age approach. Future research estimating regional brain age  
480 models trained with more advanced diffusion MRI features may offer improved sensitivity  
481 and specificity (Beck et al., 2021a).

482 MFI has previously been linked to metabolic risk factors (Therkelsen et al., 2013) and  
483 insulin resistance in obesity (Goodpaster et al., 2000). Higher liver fat has been found among  
484 diabetics (Bamberg et al., 2017; Linge et al., 2018) and prediabetics without previous  
485 cardiovascular conditions (Bamberg et al., 2017). Studies have also reported no significant  
486 association between CHD or cardiovascular events and elevated liver fat (Neeland et al.,  
487 2015). Moreover, while comparing patients with non-alcoholic fatty liver disease (NAFLD)  
488 to controls, Hagström et al., (2017) reported no significant difference in cardiovascular  
489 related death. Conflicting results however, have linked NAFLD with cardiovascular disease  
490 (Brea et al., 2017), suggesting a complex interplay between regional adipose tissue and  
491 metabolic health.

492 This complexity has recently been corroborated by findings of 62 genetic loci  
493 associated with both higher adiposity and lower cardiometabolic risk (Huang et al., 2021),  
494 possibly reflecting protective mechanisms. Although speculative, this heterogeneity is likely  
495 also reflected in connection to brain health, which for some individual genetic architectures  
496 may offer protection against brain pathology while simultaneously increasing the risk for  
497 obesity. Further studies exploiting larger samplers are needed to pursue this hypothesis and  
498 attempt to dissect the heterogeneity using genetic data (Huang et al., 2021) in combination  
499 with brain imaging.

500

#### 501 **4.2. Adiposity and brain ageing: longitudinal evidence**

502 Our longitudinal analyses revealed that the rate of brain ageing across the study period was  
503 associated with adiposity measured at follow-up, with evidence for WHR from our  
504 anthropometric measures, and MFI and WMR from adipose tissue distribution measures.  
505 While evidence for WHR was present for both T1-weighted and DTI BAGs - which largely  
506 replicates a recent report from the same cohort (Beck et al., 2021b) - evidence for MFI and  
507 WMR were only observed for T1-weighted BAG, where greater adipose tissue was  
508 associated with increased rate of brain ageing. Conversely, evidence in favour of no  
509 interaction effect with time was found for BMI. This supports that BMI alone may not  
510 represent a clinically relevant proxy, as it fails to distinguish from lean mass while ignoring  
511 regional fat distribution, in particular the visceral components (Evans et al., 2012; Roberson  
512 et al., 2014).

513 While experimental evidence is needed to establish causality, our findings suggest  
514 that adipose tissue distribution affects brain ageing and may lead to older appearing brains in  
515 generally healthy individuals. These observations are in line with previous studies, both from  
516 clinical groups and population-based cohorts. Non-alcoholic fatty liver disease, for example,  
517 has been previously linked to smaller total brain volume (Weinstein et al., 2018) and cortical  
518 and cerebellar structures (Gurholt et al., 2020), while muscle fat infiltration has been  
519 negatively associated with cortical structures (Gurholt et al., 2020). While more research into  
520 adipose tissue distribution is warranted, the current results suggest that increased liver fat,  
521 muscle fat infiltration, and weight-to-muscle ratio may contribute to accelerate brain ageing.

522

#### 523 **4.3. Brain age and adiposity: interactions with age**

524 For DTI BAG, our findings demonstrated an interaction effect with age and WHR, while T1  
525 BAG interaction effects were present for age and WMR, fat ratio, total adipose, VAT index,

526 liver fat, MFI, BMI, and WHR. The findings indicate that adiposity measures may be  
527 increasingly important predictors of BAG with increasing age. In contrast, we observed no  
528 evidence of interaction effects between age and BMI on DTI or T1 BAGs. Previous research  
529 has produced mixed results, with studies reporting an interaction of BMI and age on white  
530 matter volume but no interaction on cortical surface area or thickness (Ronan et al., 2016).  
531 Further research is warranted to elucidate the degree to which associations between adiposity  
532 and brain structure change over the course of the lifespan.

533

#### 534 **4.4. Strengths and limitations**

535 The current study benefitted from a mixed cross-sectional and longitudinal design enabling  
536 brain changes to be tracked across time. The prediction models for brain age had high  
537 accuracy, and separate T1-weighted and DTI brain age gaps provided tissue-specific  
538 measures of brain age with potential to reveal specific associations with the included  
539 adiposity measures.

540 Several limitations should be considered when evaluating the findings. First, while the  
541 longitudinal brain MRI data represent a major strength, the follow-up sample size is  
542 relatively small, and the body MRI data was only collected at the follow-up examination. The  
543 subsequent loss of power is reflected in the width of body MRI posterior distributions,  
544 indicating a higher level of uncertainty compared to BMI and WHR, which had available  
545 longitudinal measures and a larger sample size. Next, although body composition measures  
546 based on MRI offer high accuracy in terms of fat and muscle distributions and are therefore a  
547 potentially valuable supplement to conventional anthropomorphic features, future studies  
548 including biological markers such as immune and inflammation assays and lipid  
549 measurements might provide even higher specificity and opportunities for further subtyping.  
550 Indeed, inflammation has demonstrated effects on brain function and structure (Rosano et al.,  
551 2011) and has been dubbed to have a central role in the obesity-brain connection (O'Brien et  
552 al., 2017). Moreover, including detailed assessments of dietary routines, alcohol intake, and  
553 physical exercise is vital in order to better understand the complex processes at play. For  
554 example, physical activity has been associated with lower brain age (Dunås et al., 2021;  
555 Sanders et al., 2021) and higher grey and white matter measures (Sexton et al., 2016), while  
556 excess alcohol intake is well documented in influencing liver and brain health (Agartz et al.,  
557 1999; Rehm et al., 2010). Lastly, the current sample is predominantly ethnic Scandinavian  
558 and Northern European, restricting our ability to generalise to wider populations, and future  
559 studies should aim to increase the diversity in the study population.

560

#### 561 **4.5. Conclusion**

562 Combining body MRI and brain age prediction based on brain MRI allows for probing  
563 individual body composition profiles and brain patterns and trajectories which may confer  
564 risk for cardiometabolic disease and neurodegenerative disorders. More knowledge and  
565 further development of automated tools for individual phenotyping in this domain may  
566 inform public health priorities and interventions. With evidence of different adiposity  
567 subtypes being differentially linked with different brain phenotypes and cardiometabolic  
568 diseases, precision methods that look at fat distribution can potentially be more informative  
569 than conventional anthropomorphic measures. This in turn will provide a more effective tool  
570 for development of treatment strategies that focus on individual risk of metabolic disease, as  
571 well as disentangling the associations between body and brain health.

572

#### 573 **5. Acknowledgements**

574 The study is supported by the Research Council of Norway (223273, 249795, 248238,  
575 276082), the South-Eastern Norway Regional Health Authority (2014097, 2015044,  
576 2015073, 2016083, 2018037, 2018076), the Norwegian ExtraFoundation for Health and  
577 Rehabilitation (2015/FO5146), KG Jebsen Stiftelsen, Swiss National Science Foundation  
578 (grant PZ00P3\_193658), German Federal Ministry of Education and Research (BMBF, grant  
579 01ZX1904A), ERA-Net Cofund through the ERA PerMed project 'IMPLEMENT' (Research  
580 Council of Norway – 298646), and the European Research Council under the European  
581 Union's Horizon 2020 Research and Innovation program (ERC StG, Grant # 802998 and RIA  
582 Grant # 847776).

583

#### 584 **6. References**

- 585 Agartz, I., Momenan, R., Rawlings, R. R., Kerich, M. J., & Hommer, D. W. (1999).  
586 Hippocampal Volume in Patients With Alcohol Dependence. *Archives of General*  
587 *Psychiatry*, 56(4), 356–363. <https://doi.org/10.1001/archpsyc.56.4.356>  
588 Andersson, J. L. R., & Sotiropoulos, S. N. (2016). An integrated approach to correction for  
589 off-resonance effects and subject movement in diffusion MR imaging. *NeuroImage*,  
590 125, 1063–1078. <https://doi.org/10.1016/j.neuroimage.2015.10.019>

- 591 Anstey, K. J., Cherbuin, N., Budge, M., & Young, J. (2011). Body mass index in midlife and  
592 late-life as a risk factor for dementia: A meta-analysis of prospective studies: BMI  
593 and risk of dementia. *Obesity Reviews*, *12*(5), e426–e437.  
594 <https://doi.org/10.1111/j.1467-789X.2010.00825.x>
- 595 Bahrami, S., Steen, N. E., Shadrin, A., O’Connell, K., Frei, O., Bettella, F., Wirgenes, K. V.,  
596 Krull, F., Fan, C. C., Dale, A. M., Smeland, O. B., Djurovic, S., & Andreassen, O. A.  
597 (2020). Shared Genetic Loci Between Body Mass Index and Major Psychiatric  
598 Disorders: A Genome-wide Association Study. *JAMA Psychiatry*, *77*(5), 503–512.  
599 <https://doi.org/10.1001/jamapsychiatry.2019.4188>
- 600 Bamberg, F., Hetterich, H., Rospleszcz, S., Lorbeer, R., Auweter, S. D., Schlett, C. L.,  
601 Schafnitzel, A., Bayerl, C., Schindler, A., Saam, T., Müller-Peltzer, K., Sommer, W.,  
602 Zitzelsberger, T., Machann, J., Ingrisich, M., Selder, S., Rathmann, W., Heier, M.,  
603 Linkohr, B., ... Peters, A. (2017). Subclinical Disease Burden as Assessed by Whole-  
604 Body MRI in Subjects With Prediabetes, Subjects With Diabetes, and Normal Control  
605 Subjects From the General Population: The KORA-MRI Study. *Diabetes*, *66*(1), 158–  
606 169. <https://doi.org/10.2337/db16-0630>
- 607 Beck, D., de Lange, A.-M. G., Pedersen, M. L., Aln, D., Voldsbekk, I., Richard, G., Sanders,  
608 A.-M., Dørum, E. S., Kolskår, K. K., Høgestøl, E. A., Steen, N. E., Andreassen, O.  
609 A., Nordvik, J. E., Kaufmann, T., & Westlye, L. T. (n.d.). *Cardiometabolic risk*  
610 *factors associated with brain age and accelerate brain ageing*. 47.
- 611 Beck, D., de Lange, A.-M., Maximov, I. I., Richard, G., Andreassen, O. A., Nordvik, J. E., &  
612 Westlye, L. T. (2021a). White matter microstructure across the adult lifespan: A  
613 mixed longitudinal and cross-sectional study using advanced diffusion models and  
614 brain-age prediction. *NeuroImage*, *224*, 117441.  
615 <https://doi.org/10.1016/j.neuroimage.2020.117441>



- 616 Beck, D., Lange, A.-M. G. de, Pedersen, M. L., Alnæs, D., Maximov, I. I., Voldsbekk, I.,  
617 Richard, G., Sanders, A.-M., Ulrichsen, K. M., Dørum, E. S., Kolskår, K. K.,  
618 Høgestøl, E. A., Steen, N. E., Djurovic, S., Andreassen, O. A., Nordvik, J. E.,  
619 Kaufmann, T., & Westlye, L. T. (2021b). Cardiometabolic risk factors associated with  
620 brain age and accelerate brain ageing. *MedRxiv*, 2021.02.25.21252272.  
621 <https://doi.org/10.1101/2021.02.25.21252272>
- 622 Bhupathiraju, S. N., & Hu, F. B. (2016). Epidemiology of Obesity and Diabetes and Their  
623 Cardiovascular Complications. *Circulation Research*, 118(11), 1723–1735.  
624 <https://doi.org/10.1161/CIRCRESAHA.115.306825>
- 625 Brea, Á., Pintó, X., Ascaso, J. F., Blasco, M., Díaz, Á., González-Santos, P., Hernández  
626 Mijares, A., Mantilla, T., Millán, J., & Pedro-Botet, J. (2017). Nonalcoholic fatty liver  
627 disease, association with cardiovascular disease and treatment. (I). Nonalcoholic fatty  
628 liver disease and its association with cardiovascular disease. *Clínica e Investigación*  
629 *En Arteriosclerosis (English Edition)*, 29(3), 141–148.  
630 <https://doi.org/10.1016/j.artere.2016.06.001>
- 631 Bürkner, P.-C. (2017). **brms**: An R Package for Bayesian Multilevel Models Using *Stan*.  
632 *Journal of Statistical Software*, 80(1). <https://doi.org/10.18637/jss.v080.i01>
- 633 Bürkner, P.-C. (2018). Advanced Bayesian Multilevel Modeling with the R Package brms.  
634 *The R Journal*, 10(1), 395. <https://doi.org/10.32614/RJ-2018-017>
- 635 Cole, J. H. (2020). Multimodality neuroimaging brain-age in UK biobank: Relationship to  
636 biomedical, lifestyle, and cognitive factors. *Neurobiology of Aging*, 92, 34–42.  
637 <https://doi.org/10.1016/j.neurobiolaging.2020.03.014>
- 638 Cole, J. H., Poudel, R. P. K., Tsagkrasoulis, D., Caan, M. W. A., Steves, C., Spector, T. D., &  
639 Montana, G. (2017). Predicting brain age with deep learning from raw imaging data

- 640 results in a reliable and heritable biomarker. *NeuroImage*, *163*, 115–124.
- 641 <https://doi.org/10.1016/j.neuroimage.2017.07.059>
- 642 de Lange, A.-M., Barth, C., Kaufmann, T., Maximov, I. I., van der Meer, D., Agartz, I., &  
643 Westlye, L. T. (2019). *Cumulative estrogen exposure, APOE genotype, and women's*  
644 *brain aging—A population-based neuroimaging study* [Preprint]. Neuroscience.  
645 <https://doi.org/10.1101/826123>
- 646 de Lange, A.-M. G., Anatórk, M., Kaufmann, T., Cole, J. H., Griffanti, L., Zsoldos, E.,  
647 Jensen, D., Suri, S., Filippini, N., Singh-Manoux, A., Kivimäki, M., Westlye, L. T., &  
648 Ebmeier, K. P. (2020). *Multimodal brain-age prediction and cardiovascular risk: The*  
649 *Whitehall II MRI sub-study* [Preprint]. Neuroscience.  
650 <https://doi.org/10.1101/2020.01.28.923094>
- 651 de Lange, A.-M. G., & Cole, J. H. (2020). Commentary: Correction procedures in brain-age  
652 prediction. *NeuroImage: Clinical*, *26*, 102229.  
653 <https://doi.org/10.1016/j.nicl.2020.102229>
- 654 Debette, S., & Markus, H. S. (2010). The clinical importance of white matter hyperintensities  
655 on brain magnetic resonance imaging: Systematic review and meta-analysis. *BMJ*,  
656 *341*(jul26 1), c3666–c3666. <https://doi.org/10.1136/bmj.c3666>
- 657 Desikan, R. S., Ségonne, F., Fischl, B., Quinn, B. T., Dickerson, B. C., Blacker, D., Buckner,  
658 R. L., Dale, A. M., Maguire, R. P., Hyman, B. T., Albert, M. S., & Killiany, R. J.  
659 (2006). An automated labeling system for subdividing the human cerebral cortex on  
660 MRI scans into gyral based regions of interest. *NeuroImage*, *31*(3), 968–980.  
661 <https://doi.org/10.1016/j.neuroimage.2006.01.021>
- 662 Ditmars, H. L., Logue, M. W., Toomey, R., McKenzie, R. E., Franz, C. E., Panizzon, M. S.,  
663 Reynolds, C. A., Cuthbert, K. N., Vandiver, R., Gustavson, D. E., Eglit, G. M. L.,  
664 Elman, J. A., Sanderson-Cimino, M., Williams, M. E., Andreassen, O. A., Dale, A.

- 665 M., Eyler, L. T., Fennema-Notestine, C., Gillespie, N. A., ... Lyons, M. J. (2021).  
666 Associations between depression and cardiometabolic health: A 27-year longitudinal  
667 study. *Psychological Medicine*, 1–11. <https://doi.org/10.1017/S003329172000505X>
- 668 Dixon, M., Taylor, J. R., Rowe, J. B., Cusack, R., Calder, A. J., Marslen-Wilson, W. D.,  
669 Duncan, J., Dalgleish, T., Henson, R. N., Brayne, C., & Matthews, F. E. (2014). The  
670 Cambridge Centre for Ageing and Neuroscience (Cam-CAN) study protocol: A cross-  
671 sectional, lifespan, multidisciplinary examination of healthy cognitive ageing. *BMC*  
672 *Neurology*, 14(1), 204. <https://doi.org/10.1186/s12883-014-0204-1>
- 673 Dunås, T., Wåhlin, A., Nyberg, L., & Boraxbekk, C.-J. (2021). Multimodal Image Analysis  
674 of Apparent Brain Age Identifies Physical Fitness as Predictor of Brain Maintenance.  
675 *Cerebral Cortex*, bhab019. <https://doi.org/10.1093/cercor/bhab019>
- 676 Epskamp, S., Cramer, A., Waldorp, L., Schmittmann, V., & Borsboom, D. (2012). qgraph:  
677 Network Visualizations of Relationships in Psychometric Data. *Journal of Statistical*  
678 *Software*, 48. <https://doi.org/10.18637/jss.v048.i04>
- 679 Evans, P. D., McIntyre, N. J., Fluck, R. J., McIntyre, C. W., & Taal, M. W. (2012).  
680 Anthropomorphic Measurements That Include Central Fat Distribution Are More  
681 Closely Related with Key Risk Factors than BMI in CKD Stage 3. *PLoS ONE*, 7(4).  
682 <https://doi.org/10.1371/journal.pone.0034699>
- 683 Filzmoser, P., Garrett, R. G., & Reimann, C. (2005). *Multivariate outlier detection in*  
684 *exploration geochemistry*. 9.
- 685 Fischl, B., Salat, D. H., Busa, E., Albert, M., Dieterich, M., Haselgrove, C., van der Kouwe,  
686 A., Killiany, R., Kennedy, D., Klaveness, S., Montillo, A., Makris, N., Rosen, B., &  
687 Dale, A. M. (2002). Whole Brain Segmentation. *Neuron*, 33(3), 341–355.  
688 [https://doi.org/10.1016/S0896-6273\(02\)00569-X](https://doi.org/10.1016/S0896-6273(02)00569-X)

- 689 Franke, K., Ristow, M., & Gaser, C. (2014). Gender-specific impact of personal health  
690 parameters on individual brain aging in cognitively unimpaired elderly subjects.  
691 *Frontiers in Aging Neuroscience*, 6. <https://doi.org/10.3389/fnagi.2014.00094>
- 692 Friedman, J. I., Tang, C. Y., de Haas, H. J., Changchien, L., Goliash, G., Dabas, P., Wang,  
693 V., Fayad, Z. A., Fuster, V., & Narula, J. (2014). Brain imaging changes associated  
694 with risk factors for cardiovascular and cerebrovascular disease in asymptomatic  
695 patients. *JACC. Cardiovascular Imaging*, 7(10), 1039–1053.  
696 <https://doi.org/10.1016/j.jcmg.2014.06.014>
- 697 Goodpaster, B. H., Thaete, F. L., & Kelley, D. E. (2000). Thigh adipose tissue distribution is  
698 associated with insulin resistance in obesity and in type 2 diabetes mellitus. *The*  
699 *American Journal of Clinical Nutrition*, 71(4), 885–892.  
700 <https://doi.org/10.1093/ajcn/71.4.885>
- 701 Gunstad, J., Cohen, R. A., Tate, D. F., Paul, R. H., Poppas, A., Hoth, K., Macgregor, K. L., &  
702 Jefferson, A. L. (2005). Blood pressure variability and white matter hyperintensities  
703 in older adults with cardiovascular disease. *Blood Pressure*, 14(6), 353–358.  
704 <https://doi.org/10.1080/08037050500364117>
- 705 Gurholt, T. P., Kaufmann, T., Frei, O., Alnæs, D., Haukvik, U. K., van der Meer, D.,  
706 Moberget, T., O’Connell, K. S., Leinhard, O. D., Linge, J., Simon, R., Smeland, O.  
707 B., Søndersby, I. E., Winterton, A., Steen, N. E., Westlye, L. T., & Andreassen, O. A.  
708 (2020). *Population-based body-brain mapping links brain morphology and body*  
709 *composition* [Preprint]. Neuroscience. <https://doi.org/10.1101/2020.02.29.970095>
- 710 Hagström, H., Nasr, P., Ekstedt, M., Hammar, U., Stål, P., Hulcrantz, R., & Kechagias, S.  
711 (2017). Fibrosis stage but not NASH predicts mortality and time to development of  
712 severe liver disease in biopsy-proven NAFLD. *Journal of Hepatology*, 67(6), 1265–  
713 1273. <https://doi.org/10.1016/j.jhep.2017.07.027>

- 714 Han, L. K. M., Dinga, R., Hahn, T., Ching, C. R. K., Eyler, L. T., Aftanas, L., Aghajani, M.,  
715 Aleman, A., Baune, B. T., Berger, K., Brak, I., Filho, G. B., Carballedo, A., Connolly,  
716 C. G., Couvy-Duchesne, B., Cullen, K. R., Dannlowski, U., Davey, C. G., Dima, D.,  
717 ... Schmaal, L. (2020). Brain aging in major depressive disorder: Results from the  
718 ENIGMA major depressive disorder working group. *Molecular Psychiatry*.  
719 <https://doi.org/10.1038/s41380-020-0754-0>
- 720 Høgestøl, E. A., Kaufmann, T., Nygaard, G. O., Beyer, M. K., Sowa, P., Nordvik, J. E.,  
721 Kolskår, K., Richard, G., Andreassen, O. A., Harbo, H. F., & Westlye, L. T. (2019).  
722 Cross-Sectional and Longitudinal MRI Brain Scans Reveal Accelerated Brain Aging  
723 in Multiple Sclerosis. *Frontiers in Neurology*, *10*, 450.  
724 <https://doi.org/10.3389/fneur.2019.00450>
- 725 Hua, K., Zhang, J., Wakana, S., Jiang, H., Li, X., Reich, D. S., Calabresi, P. A., Pekar, J. J.,  
726 van Zijl, P. C. M., & Mori, S. (2008). Tract probability maps in stereotaxic spaces:  
727 Analyses of white matter anatomy and tract-specific quantification. *NeuroImage*,  
728 *39*(1), 336–347. <https://doi.org/10.1016/j.neuroimage.2007.07.053>
- 729 Huang, L. O., Rauch, A., Mazzaferro, E., Preuss, M., Carobbio, S., Bayrak, C. S., Chami, N.,  
730 Wang, Z., Schick, U. M., Yang, N., Itan, Y., Vidal-Puig, A., den Hoed, M., Mandrup,  
731 S., Kilpeläinen, T. O., & Loos, R. J. F. (2021). Genome-wide discovery of genetic  
732 loci that uncouple excess adiposity from its comorbidities. *Nature Metabolism*, *3*(2),  
733 228–243. <https://doi.org/10.1038/s42255-021-00346-2>
- 734 Iacobini, C., Pugliese, G., Blasetti Fantauzzi, C., Federici, M., & Menini, S. (2019).  
735 Metabolically healthy versus metabolically unhealthy obesity. *Metabolism*, *92*, 51–60.  
736 <https://doi.org/10.1016/j.metabol.2018.11.009>
- 737 Jenkinson, M., Beckmann, C. F., Behrens, T. E. J., Woolrich, M. W., & Smith, S. M. (2012).  
738 FSL. *NeuroImage*, *62*(2), 782–790. <https://doi.org/10.1016/j.neuroimage.2011.09.015>

- 739 Jørgensen, K. N., Nesvåg, R., Nerland, S., Mørch-Johnsen, L., Westlye, L. T., Lange, E. H.,  
740 Haukvik, U. K., Hartberg, C. B., Melle, I., Andreassen, O. A., & Agartz, I. (2017).  
741 Brain volume change in first-episode psychosis: An effect of antipsychotic  
742 medication independent of BMI change. *Acta Psychiatrica Scandinavica*, *135*(2),  
743 117–126. <https://doi.org/10.1111/acps.12677>
- 744 Kaufmann, T., Meer, D. van der, Doan, N. T., Schwarz, E., Lund, M. J., Agartz, I., Alnæs,  
745 D., Barch, D. M., Baur-Streubel, R., Bertolino, A., Bettella, F., Beyer, M. K., Bøen,  
746 E., Borgwardt, S., Brandt, C. L., Buitelaar, J., Celiuș, E. G., Cervenka, S.,  
747 Conzelmann, A., ... Westlye, L. T. (2019). Common brain disorders are associated  
748 with heritable patterns of apparent aging of the brain. *Nature Neuroscience*, *22*(10),  
749 1617–1623. <https://doi.org/10.1038/s41593-019-0471-7>
- 750 Kaufmann, T., van der Meer, D., Doan, N. T., Schwarz, E., Lund, M. J., Agartz, I., Alnæs,  
751 D., Barch, D. M., Baur-Streubel, R., Bertolino, A., Bettella, F., Beyer, M. K., Bøen,  
752 E., Borgwardt, S., Brandt, C. L., Buitelaar, J., Celiuș, E. G., Cervenka, S.,  
753 Conzelmann, A., ... Westlye, L. T. (2019). Common brain disorders are associated  
754 with heritable patterns of apparent aging of the brain. *Nature Neuroscience*, *22*(10),  
755 1617–1623. <https://doi.org/10.1038/s41593-019-0471-7>
- 756 Kellner, E., Dhital, B., Kiselev, V. G., & Reiser, M. (2016). Gibbs-ringing artifact removal  
757 based on local subvoxel-shifts. *Magnetic Resonance in Medicine*, *76*(5), 1574–1581.  
758 <https://doi.org/10.1002/mrm.26054>
- 759 Kolbeinsson, A., Filippi, S., Panagakis, Y., Matthews, P. M., Elliott, P., Dehghan, A., &  
760 Tzoulaki, I. (2020). Accelerated MRI-predicted brain ageing and its associations with  
761 cardiometabolic and brain disorders. *Scientific Reports*, *10*(1), 19940.  
762 <https://doi.org/10.1038/s41598-020-76518-z>

- 763 Kolenic, M., Franke, K., Hlinka, J., Matejka, M., Capkova, J., Pausova, Z., Uher, R., Alda,  
764 M., Spaniel, F., & Hajek, T. (2018). Obesity, dyslipidemia and brain age in first-  
765 episode psychosis. *Journal of Psychiatric Research*, *99*, 151–158.  
766 <https://doi.org/10.1016/j.jpsychires.2018.02.012>
- 767 Liang, H., Zhang, F., & Niu, X. (2019). Investigating systematic bias in brain age estimation  
768 with application to post-traumatic stress disorders. *Human Brain Mapping*,  
769 *hbm.24588*. <https://doi.org/10.1002/hbm.24588>
- 770 Linge, J., Borga, M., West, J., Tuthill, T., Miller, M. R., Dumitriu, A., Thomas, E. L., Romu,  
771 T., Tunón, P., Bell, J. D., & Dahlqvist Leinhard, O. (2018). Body Composition  
772 Profiling in the UK Biobank Imaging Study: Body Composition Profiling in UK  
773 Biobank. *Obesity*, *26*(11), 1785–1795. <https://doi.org/10.1002/oby.22210>
- 774 Linge, J., Ekstedt, M., & Dahlqvist Leinhard, O. (2021). Adverse muscle composition is  
775 linked to poor functional performance and metabolic comorbidities in NAFLD. *JHEP*  
776 *Reports*, *3*(1), 100197. <https://doi.org/10.1016/j.jhepr.2020.100197>
- 777 Linge, J., Heymsfield, S. B., & Dahlqvist Leinhard, O. (2020). On the Definition of  
778 Sarcopenia in the Presence of Aging and Obesity—Initial Results from UK Biobank.  
779 *The Journals of Gerontology: Series A*, *75*(7), 1309–1316.  
780 <https://doi.org/10.1093/gerona/glz229>
- 781 Linge, J., Witcher, B., Borga, M., & Leinhard, O. D. (2019). Sub-phenotyping Metabolic  
782 Disorders Using Body Composition: An Individualized, Nonparametric Approach  
783 Utilizing Large Data Sets. *Obesity*, *27*(7), 1190–1199.  
784 <https://doi.org/10.1002/oby.22510>
- 785 Luppino, F. S., de Wit, L. M., Bouvy, P. F., Stijnen, T., Cuijpers, P., Penninx, B. W. J. H., &  
786 Zitman, F. G. (2010). Overweight, obesity, and depression: A systematic review and

- 787 meta-analysis of longitudinal studies. *Archives of General Psychiatry*, 67(3), 220–  
788 229. <https://doi.org/10.1001/archgenpsychiatry.2010.2>
- 789 Marks, B. L., Katz, L. M., Styner, M., & Smith, J. K. (2011). Aerobic fitness and obesity:  
790 Relationship to cerebral white matter integrity in the brain of active and sedentary  
791 older adults. *British Journal of Sports Medicine*, 45(15), 1208–1215.  
792 <https://doi.org/10.1136/bjsm.2009.068114>
- 793 Maximov, I. I., Alnæs, D., & Westlye, L. T. (2019). Towards an optimised processing  
794 pipeline for diffusion magnetic resonance imaging data: Effects of artefact corrections  
795 on diffusion metrics and their age associations in UK Biobank. *Human Brain*  
796 *Mapping*, 40(14), 4146–4162. <https://doi.org/10.1002/hbm.24691>
- 797 Mueller, K., Anwander, A., Möller, H. E., Horstmann, A., Lepsien, J., Busse, F.,  
798 Mohammadi, S., Schroeter, M. L., Stumvoll, M., Villringer, A., & Pleger, B. (2011).  
799 Sex-Dependent Influences of Obesity on Cerebral White Matter Investigated by  
800 Diffusion-Tensor Imaging. *PLOS ONE*, 6(4), e18544.  
801 <https://doi.org/10.1371/journal.pone.0018544>
- 802 Mulugeta, A., Lumsden, A., & Hyppönen, E. (2021). Unlocking the causal link of  
803 metabolically different adiposity subtypes with brain volumes and the risks of  
804 dementia and stroke: A Mendelian randomization study. *Neurobiology of Aging*,  
805 S0197458021000658. <https://doi.org/10.1016/j.neurobiolaging.2021.02.010>
- 806 Neeland, I. J., Turer, A. T., Ayers, C. R., Berry, J. D., Rohatgi, A., Das, S. R., Khera, A.,  
807 Vega, G. L., McGuire, D. K., Grundy, S. M., & de Lemos, J. A. (2015). Body Fat  
808 Distribution and Incident Cardiovascular Disease in Obese Adults. *Journal of the*  
809 *American College of Cardiology*, 65(19), 2150–2151.  
810 <https://doi.org/10.1016/j.jacc.2015.01.061>



- 811 O'Brien, P. D., Hinder, L. M., Callaghan, B. C., & Feldman, E. L. (2017). Neurological  
812 consequences of obesity. *The Lancet Neurology*, *16*(6), 465–477.  
813 [https://doi.org/10.1016/S1474-4422\(17\)30084-4](https://doi.org/10.1016/S1474-4422(17)30084-4)
- 814 Pannacciulli, N., Del Parigi, A., Chen, K., Le, D. S. N. T., Reiman, E. M., & Tataranni, P. A.  
815 (2006). Brain abnormalities in human obesity: A voxel-based morphometric study.  
816 *NeuroImage*, *31*(4), 1419–1425. <https://doi.org/10.1016/j.neuroimage.2006.01.047>
- 817 Pardoe, H. R., Cole, J. H., Blackmon, K., Thesen, T., & Kuzniecky, R. (2017). Structural  
818 brain changes in medically refractory focal epilepsy resemble premature brain aging.  
819 *Epilepsy Research*, *133*, 28–32. <https://doi.org/10.1016/j.eplepsyres.2017.03.007>
- 820 Perry, B. I., Stochl, J., Upthegrove, R., Zammit, S., Wareham, N., Langenberg, C.,  
821 Winpenny, E., Dunger, D., Jones, P. B., & Khandaker, G. M. (2021). Longitudinal  
822 Trends in Childhood Insulin Levels and Body Mass Index and Associations With  
823 Risks of Psychosis and Depression in Young Adults. *JAMA Psychiatry*.  
824 <https://doi.org/10.1001/jamapsychiatry.2020.4180>
- 825 Qiu, C., & Fratiglioni, L. (2015). A major role for cardiovascular burden in age-related  
826 cognitive decline. *Nature Reviews Cardiology*, *12*(5), 267–277.  
827 <https://doi.org/10.1038/nrcardio.2014.223>
- 828 Quintana, D. S., Dieset, I., Elvsåshagen, T., Westlye, L. T., & Andreassen, O. A. (2017).  
829 Oxytocin system dysfunction as a common mechanism underlying metabolic  
830 syndrome and psychiatric symptoms in schizophrenia and bipolar disorders. *Frontiers*  
831 *in Neuroendocrinology*, *45*, 1–10. <https://doi.org/10.1016/j.yfrne.2016.12.004>
- 832 Rajan, T., & Menon, V. (2017). Psychiatric disorders and obesity: A review of association  
833 studies. *Journal of Postgraduate Medicine*, *63*(3), 182–190.  
834 [https://doi.org/10.4103/jpgm.JPGM\\_712\\_16](https://doi.org/10.4103/jpgm.JPGM_712_16)

- 835 Raji, C. A., Ho, A. J., Parikshak, N. N., Becker, J. T., Lopez, O. L., Kuller, L. H., Hua, X.,  
836 Leow, A. D., Toga, A. W., & Thompson, P. M. (2010). Brain structure and obesity.  
837 *Human Brain Mapping, 31*(3), 353–364. <https://doi.org/10.1002/hbm.20870>
- 838 Rapuano, K. M., Laurent, J. S., Hagler, D. J., Hatton, S. N., Thompson, W. K., Jernigan, T.  
839 L., Dale, A. M., Casey, B. J., & Watts, R. (2020). Nucleus accumbens  
840 cytoarchitecture predicts weight gain in children. *Proceedings of the National*  
841 *Academy of Sciences, 117*(43), 26977–26984.  
842 <https://doi.org/10.1073/pnas.2007918117>
- 843 Rehm, J., Taylor, B., Mohapatra, S., Irving, H., Baliunas, D., Patra, J., & Roerecke, M.  
844 (2010). Alcohol as a risk factor for liver cirrhosis: A systematic review and meta-  
845 analysis. *Drug and Alcohol Review, 29*(4), 437–445. [https://doi.org/10.1111/j.1465-](https://doi.org/10.1111/j.1465-3362.2009.00153.x)  
846 [3362.2009.00153.x](https://doi.org/10.1111/j.1465-3362.2009.00153.x)
- 847 Reuter, M., & Fischl, B. (2011). Avoiding asymmetry-induced bias in longitudinal image  
848 processing. *NeuroImage, 57*(1), 19–21.  
849 <https://doi.org/10.1016/j.neuroimage.2011.02.076>
- 850 Reuter, M., Rosas, H. D., & Fischl, B. (2010). Highly accurate inverse consistent registration:  
851 A robust approach. *NeuroImage, 53*(4), 1181–1196.  
852 <https://doi.org/10.1016/j.neuroimage.2010.07.020>
- 853 Reuter, M., Schmansky, N. J., Rosas, H. D., & Fischl, B. (2012). Within-subject template  
854 estimation for unbiased longitudinal image analysis. *NeuroImage, 61*(4), 1402–1418.  
855 <https://doi.org/10.1016/j.neuroimage.2012.02.084>
- 856 Richard, G., Kolskår, K., Sanders, A.-M., Kaufmann, T., Petersen, A., Doan, N. T., Monereo  
857 Sánchez, J., Alnæs, D., Ulrichsen, K. M., Dørum, E. S., Andreassen, O. A., Nordvik,  
858 J. E., & Westlye, L. T. (2018). Assessing distinct patterns of cognitive aging using

859 tissue-specific brain age prediction based on diffusion tensor imaging and brain  
860 morphometry. *PeerJ*, 6, e5908. <https://doi.org/10.7717/peerj.5908>

861 Richard, G., Kolskår, K., Ulrichsen, K. M., Kaufmann, T., Alnæs, D., Sanders, A.-M.,  
862 Dørum, E. S., Monereo Sánchez, J., Petersen, A., Ihle-Hansen, H., Nordvik, J. E., &  
863 Westlye, L. T. (2020). Brain age prediction in stroke patients: Highly reliable but  
864 limited sensitivity to cognitive performance and response to cognitive training.  
865 *NeuroImage: Clinical*, 25, 102159. <https://doi.org/10.1016/j.nicl.2019.102159>

866 Ringen, P. A., Faerden, A., Antonsen, B., Falk, R. S., Mamen, A., Rognli, E. B., Solberg, D.  
867 K., Andreassen, O. A., & Martinsen, E. W. (2018). Cardiometabolic risk factors,  
868 physical activity and psychiatric status in patients in long-term psychiatric inpatient  
869 departments. *Nordic Journal of Psychiatry*, 72(4), 296–302.  
870 <https://doi.org/10.1080/08039488.2018.1449012>

871 Roalf, D. R., Quarmley, M., Elliott, M. A., Satterthwaite, T. D., Vandekar, S. N., Ruparel, K.,  
872 Gennatas, E. D., Calkins, M. E., Moore, T. M., Hopson, R., Prabhakaran, K., Jackson,  
873 C. T., Verma, R., Hakonarson, H., Gur, R. C., & Gur, R. E. (2016). The impact of  
874 quality assurance assessment on diffusion tensor imaging outcomes in a large-scale  
875 population-based cohort. *NeuroImage*, 125, 903–919.  
876 <https://doi.org/10.1016/j.neuroimage.2015.10.068>

877 Roberson, L. L., Aneni, E. C., Maziak, W., Agatston, A., Feldman, T., Rouseff, M., Tran, T.,  
878 Blaha, M. J., Santos, R. D., Sposito, A., Al-Mallah, M. H., Blankstein, R., Budoff, M.  
879 J., & Nasir, K. (2014). Beyond BMI: The “Metabolically healthy obese” phenotype &  
880 its association with clinical/subclinical cardiovascular disease and all-cause mortality  
881 -- a systematic review. *BMC Public Health*, 14(1), 14. [https://doi.org/10.1186/1471-](https://doi.org/10.1186/1471-2458-14-14)  
882 2458-14-14

- 883 Ronan, L., Alexander-Bloch, A. F., Wagstyl, K., Farooqi, S., Brayne, C., Tyler, L. K., &  
884 Fletcher, P. C. (2016). Obesity associated with increased brain age from midlife.  
885 *Neurobiology of Aging*, 47, 63–70.  
886 <https://doi.org/10.1016/j.neurobiolaging.2016.07.010>
- 887 Rosano, C., Marsland, A. L., & Gianaros, P. J. (2011). Maintaining Brain Health by  
888 Monitoring Inflammatory Processes: A Mechanism to Promote Successful Aging.  
889 *Aging and Disease*, 3(1), 16–33.
- 890 Rueckert, D., Sonoda, L. I., Hayes, C., Hill, D. L. G., Leach, M. O., & Hawkes, D. J. (1999).  
891 Nonrigid registration using free-form deformations: Application to breast MR images.  
892 *IEEE Transactions on Medical Imaging*, 18(8), 712–721.  
893 <https://doi.org/10.1109/42.796284>
- 894 Sanders, A.-M., Richard, G., Kolskår, K., Ulrichsen, K. M., Kaufmann, T., Alnæs, D., Beck,  
895 D., Dørum, E. S., Lange, A.-M. G. de, Nordvik, J. E., & Westlye, L. T. (2021).  
896 Linking objective measures of physical activity and capability with brain structure in  
897 healthy community dwelling older adults. *MedRxiv*, 2021.01.28.21250529.  
898 <https://doi.org/10.1101/2021.01.28.21250529>
- 899 Scott, K. M., McGee, M. A., Wells, J. E., & Oakley Browne, M. A. (2008). Obesity and  
900 mental disorders in the adult general population. *Journal of Psychosomatic Research*,  
901 64(1), 97–105. <https://doi.org/10.1016/j.jpsychores.2007.09.006>
- 902 Sexton, C. E., Betts, J. F., Demnitz, N., Dawes, H., Ebmeier, K. P., & Johansen-Berg, H.  
903 (2016). A systematic review of MRI studies examining the relationship between  
904 physical fitness and activity and the white matter of the ageing brain. *NeuroImage*,  
905 131, 81–90. <https://doi.org/10.1016/j.neuroimage.2015.09.071>
- 906 Smith, S. M. (2002). Fast robust automated brain extraction. *Human Brain Mapping*, 17(3),  
907 143–155. <https://doi.org/10.1002/hbm.10062>

- 908 Smith, S. M., Jenkinson, M., Johansen-Berg, H., Rueckert, D., Nichols, T. E., Mackay, C. E.,  
909 Watkins, K. E., Ciccarelli, O., Cader, M. Z., Matthews, P. M., & Behrens, T. E. J.  
910 (2006). Tract-based spatial statistics: Voxelwise analysis of multi-subject diffusion  
911 data. *NeuroImage*, *31*(4), 1487–1505.  
912 <https://doi.org/10.1016/j.neuroimage.2006.02.024>
- 913 Smith, S. M., Jenkinson, M., Woolrich, M. W., Beckmann, C. F., Behrens, T. E. J., Johansen-  
914 Berg, H., Bannister, P. R., De Luca, M., Drobnjak, I., Flitney, D. E., Niazy, R. K.,  
915 Saunders, J., Vickers, J., Zhang, Y., De Stefano, N., Brady, J. M., & Matthews, P. M.  
916 (2004). Advances in functional and structural MR image analysis and implementation  
917 as FSL. *NeuroImage*, *23*, S208–S219.  
918 <https://doi.org/10.1016/j.neuroimage.2004.07.051>
- 919 Sone, D., Beheshti, I., Maikusa, N., Ota, M., Kimura, Y., Sato, N., Koepp, M., & Matsuda, H.  
920 (2019). Neuroimaging-based brain-age prediction in diverse forms of epilepsy: A  
921 signature of psychosis and beyond. *Molecular Psychiatry*.  
922 <https://doi.org/10.1038/s41380-019-0446-9>
- 923 Stanek, K. M., Grieve, S. M., Brickman, A. M., Korgaonkar, M. S., Paul, R. H., Cohen, R.  
924 A., & Gunstad, J. J. (2011). Obesity Is Associated With Reduced White Matter  
925 Integrity in Otherwise Healthy Adults\*. *Obesity*, *19*(3), 500–504.  
926 <https://doi.org/10.1038/oby.2010.312>
- 927 Strazzullo, P., D’Elia, L., Cairella, G., Garbagnati, F., Cappuccio, F. P., & Scalfi, L. (2010).  
928 Excess body weight and incidence of stroke: Meta-analysis of prospective studies  
929 with 2 million participants. *Stroke*, *41*(5), e418-426.  
930 <https://doi.org/10.1161/STROKEAHA.109.576967>
- 931 Taki, Y., Kinomura, S., Sato, K., Inoue, K., Goto, R., Okada, K., Uchida, S., Kawashima, R.,  
932 & Fukuda, H. (2008). Relationship Between Body Mass Index and Gray Matter

- 933 Volume in 1,428 Healthy Individuals. *Obesity*, *16*(1), 119–124.
- 934 <https://doi.org/10.1038/oby.2007.4>
- 935 Taylor, J. R., Williams, N., Cusack, R., Auer, T., Shafto, M. A., Dixon, M., Tyler, L. K.,  
936 Cam-CAN, & Henson, R. N. (2017). The Cambridge Centre for Ageing and  
937 Neuroscience (Cam-CAN) data repository: Structural and functional MRI, MEG, and  
938 cognitive data from a cross-sectional adult lifespan sample. *NeuroImage*, *144*, 262–  
939 269. <https://doi.org/10.1016/j.neuroimage.2015.09.018>
- 940 Therkelsen, K. E., Pedley, A., Speliotes, E. K., Massaro, J. M., Murabito, J., Hoffmann, U.,  
941 & Fox, C. S. (2013). Intramuscular fat and associations with metabolic risk factors in  
942 the Framingham Heart Study. *Arteriosclerosis, Thrombosis, and Vascular Biology*,  
943 *33*(4), 863–870. <https://doi.org/10.1161/ATVBAHA.112.301009>
- 944 Tønnesen, S., Kaufmann, T., de Lange, A.-M. G., Richard, G., Doan, N. T., Alnæs, D., van  
945 der Meer, D., Rokicki, J., Moberget, T., Maximov, I. I., Agartz, I., Aminoff, S. R.,  
946 Beck, D., Barch, D. M., Beresniewicz, J., Cervenka, S., Fatouros-Bergman, H.,  
947 Craven, A. R., Flyckt, L., ... Sellgren, C. (2020). Brain Age Prediction Reveals  
948 Aberrant Brain White Matter in Schizophrenia and Bipolar Disorder: A Multisample  
949 Diffusion Tensor Imaging Study. *Biological Psychiatry: Cognitive Neuroscience and*  
950 *Neuroimaging*, S2451902220301683. <https://doi.org/10.1016/j.bpsc.2020.06.014>
- 951 Tønnesen, S., Kaufmann, T., Doan, N. T., Alnæs, D., Córdova-Palomera, A., Meer, D. van  
952 der, Rokicki, J., Moberget, T., Gurholt, T. P., Haukvik, U. K., Ueland, T., Lagerberg,  
953 T. V., Agartz, I., Andreassen, O. A., & Westlye, L. T. (2018). White matter  
954 aberrations and age-related trajectories in patients with schizophrenia and bipolar  
955 disorder revealed by diffusion tensor imaging. *Scientific Reports*, *8*(1), 14129.  
956 <https://doi.org/10.1038/s41598-018-32355-9>

- 957 van Buuren, S., & Groothuis-Oudshoorn, K. (n.d.). mice: Multivariate Imputation by Chained  
958 Equations in R. *Journal of Statistical Software*, 67.
- 959 Veraart, J., Fieremans, E., & Novikov, D. S. (2016). Diffusion MRI noise mapping using  
960 random matrix theory. *Magnetic Resonance in Medicine*, 76(5), 1582–1593.  
961 <https://doi.org/10.1002/mrm.26059>
- 962 Wagenmakers, E.-J., Lodewyckx, T., Kuriyal, H., & Grasman, R. (2010). Bayesian  
963 hypothesis testing for psychologists: A tutorial on the Savage–Dickey method.  
964 *Cognitive Psychology*, 60(3), 158–189.  
965 <https://doi.org/10.1016/j.cogpsych.2009.12.001>
- 966 Walther, K., Birdsill, A. C., Glisky, E. L., & Ryan, L. (2010). Structural brain differences and  
967 cognitive functioning related to body mass index in older females. *Human Brain  
968 Mapping*, 31(7), 1052–1064. <https://doi.org/10.1002/hbm.20916>
- 969 Ward, M. A., Carlsson, C. M., Trivedi, M. A., Sager, M. A., & Johnson, S. C. (2005). The  
970 effect of body mass index on global brain volume in middle-aged adults: A cross  
971 sectional study. *BMC Neurology*, 5(1), 23. <https://doi.org/10.1186/1471-2377-5-23>
- 972 Weinstein, G., Zelber-Sagi, S., Preis, S. R., Beiser, A. S., DeCarli, C., Speliotes, E. K.,  
973 Satizabal, C. L., Vasan, R. S., & Seshadri, S. (2018). Association of Nonalcoholic  
974 Fatty Liver Disease With Lower Brain Volume in Healthy Middle-aged Adults in the  
975 Framingham Study. *JAMA Neurology*, 75(1), 97–104.  
976 <https://doi.org/10.1001/jamaneurol.2017.3229>
- 977 Willette, A. A., & Kapogiannis, D. (2015). Does the brain shrink as the waist expands?  
978 *Ageing Research Reviews*, 20, 86–97. <https://doi.org/10.1016/j.arr.2014.03.007>
- 979 Xu, J., Li, Y., Lin, H., Sinha, R., & Potenza, M. N. (2013). Body mass index correlates  
980 negatively with white matter integrity in the fornix and corpus callosum: A diffusion

981 tensor imaging study. *Human Brain Mapping*, 34(5), 1044–1052.  
982 <https://doi.org/10.1002/hbm.21491>  
983 Yusuf, S., Hawken, S., & Ounpuu, S. (2004). Effect of potentially modifiable risk factors  
984 associated with myocardial infarction in 52 countries (the INTERHEART study):  
985 Case-control study. *ACC Current Journal Review*, 13(12), 15–16.  
986 <https://doi.org/10.1016/j.accreview.2004.11.072>  
987
